# Supplementary material for: New Perspectives of Multiplex Mass Spectrometry Blood Protein Quantification on Microsamples in Biological Monitoring of Elderly Patients
Source: MDPI journal article supplement (doi:10.3390/ijms24086989), 2023-04-10
Supplement: s1 [file s1]

## Supplementary information

|                                                                                                                                                                                                                                             |    |
|---------------------------------------------------------------------------------------------------------------------------------------------------------------------------------------------------------------------------------------------|----|
| Supplementary information .....                                                                                                                                                                                                             | 1  |
| Table S1: List of proteins, corresponding peptides .....                                                                                                                                                                                    | 2  |
| Table S2: List of the quantifications of the 62 proteins according to the different types of samples (plasma micro samples and Dried Blood Spots DBS) for each patient and expressed in z-score (cf Excel file Supplemental Table 2). ..... | 4  |
| Table S3: List of proteins and analytical performance of microsample multiplex analyses .....                                                                                                                                               | 5  |
| Table S4: Descriptive and statistic results when comparing low IADL group to high IADL group. ....                                                                                                                                          | 7  |
| Table S5: Optimized collision energy for the different peptide ions .....                                                                                                                                                                   | 13 |
| Figure S1: LC-MRM chromatogram and calibration curves .....                                                                                                                                                                                 | 32 |
| Sup Methods .....                                                                                                                                                                                                                           | 32 |
| Chemicals used .....                                                                                                                                                                                                                        | 32 |
| Preparation of samples before mass spectrometry analysis .....                                                                                                                                                                              | 33 |
| Mass Spectrometry Analysis .....                                                                                                                                                                                                            | 33 |
| Stable isotopically labelled peptide mix .....                                                                                                                                                                                              | 34 |
| Precision study .....                                                                                                                                                                                                                       | 38 |

**Table S1: List of proteins, corresponding peptides**

Protein names, sequence of the proteotypic peptides used for its mass spectrometry detection and Uniprot access number are reported. Link the the LabTestOnline description of the protein are provided, as well as the reference number in the French nomenclature of biological test and the corresponding reimbursement cost indicate in B (which corresponds to the cost unit (0.27€ in 2021) of the biological assays in France). (\*) the five proteins corresponding the clinical trial main outcome.

| Protein Name                           | Peptide              | UniProt<br>KB<br>Accession<br>No. | Lab-test-online®                                                                                                                                                                              | Code<br>(NABM) | Cost<br>(B) |
|----------------------------------------|----------------------|-----------------------------------|-----------------------------------------------------------------------------------------------------------------------------------------------------------------------------------------------|----------------|-------------|
| Afamin                                 | DADPDTFFAK           | P43652                            |                                                                                                                                                                                               | /              | /           |
| Albumin *                              | LVNEVTEFAK           | P02768                            | <a href="https://labtestsonline.org/tests/albumin">https://labtestsonline.org/tests/albumin</a>                                                                                               | 1806           | 6           |
| Alpha-1-acid<br>glycoprotein 1 (AAG) * | TEDTIFLR             | P02763                            |                                                                                                                                                                                               | 1808           | 30          |
| Alpha-1-<br>antichymotrypsin           | NLAVSQVVHK           | P01011                            |                                                                                                                                                                                               | 1807           | 30          |
| Alpha-1B-glycoprotein                  | GVTFLLR              | P04217                            | <a href="https://labtestsonline.org/tests/protein-electrophoresis-immunofixation-electrophoresis">https://labtestsonline.org/tests/protein-electrophoresis-immunofixation-electrophoresis</a> | /              | /           |
| Alpha-2-antiplasmin                    | LGNQEPGGQTALK        | P08697                            |                                                                                                                                                                                               | E054           | 140         |
| Alpha-2-HS-glycoprotein                | FSVVYAK              | P02765                            |                                                                                                                                                                                               | /              | /           |
| Alpha-2-macroglobulin                  | AIGYLNTGYQR          | P01023                            | <a href="https://labtestsonline.org/tests/protein-electrophoresis-immunofixation-electrophoresis">https://labtestsonline.org/tests/protein-electrophoresis-immunofixation-electrophoresis</a> | 1805           | 25          |
| Antithrombin-III                       | DDLIVSDAFHK          | P01008                            | <a href="https://labtestsonline.org/tests/antithrombin">https://labtestsonline.org/tests/antithrombin</a>                                                                                     | 0188           | 38          |
| Apolipoprotein A-I                     | ATEHLSTLSEK          | P02647                            | <a href="https://labtestsonline.org/tests/apo-i">https://labtestsonline.org/tests/apo-i</a>                                                                                                   | 1603           | 7           |
| Apolipoprotein A-IV                    | LLPHANEVSQK          | P06727                            |                                                                                                                                                                                               | /              | /           |
| Apolipoprotein B-100                   | TGISPLALIK           | P04114                            | <a href="https://labtestsonline.org/tests/apo-b">https://labtestsonline.org/tests/apo-b</a>                                                                                                   | 1602           | 7           |
| Apolipoprotein C-II                    | TAAQNLYEK            | P02655                            |                                                                                                                                                                                               | L171           | 40          |
| Apolipoprotein D                       | VLNQELR              | P05090                            |                                                                                                                                                                                               | /              | /           |
| Apolipoprotein E                       | LGPLVEQGR            | P02649                            | <a href="https://labtestsonline.org/tests/apoe-genotyping-cardiovascular-disease">https://labtestsonline.org/tests/apoe-genotyping-cardiovascular-disease</a>                                 | L034           | 200         |
| Apolipoprotein M                       | AFLTTPR              | O95445                            |                                                                                                                                                                                               | /              | /           |
| Apolipoprotein(a)                      | GTYSTTVTGR           | P08519                            | <a href="https://labtestsonline.org/tests/lipoprotein-a">https://labtestsonline.org/tests/lipoprotein-a</a>                                                                                   | /              | /           |
| Beta-2-glycoprotein 1                  | ATVVYQGER            | P02749                            |                                                                                                                                                                                               | /              | /           |
| Beta-2-microglobulin                   | IQVYSR               | P61769                            | <a href="https://labtestsonline.org/tests/beta-2-microglobulin-kidney-disease">https://labtestsonline.org/tests/beta-2-microglobulin-kidney-disease</a>                                       | 324            | /           |
| Beta-Ala-His dipeptidase               | SVVLIPLGAVDDGEHSQNEK | Q96KN2                            |                                                                                                                                                                                               | /              | /           |
| C4b-binding protein<br>alpha chain     | EDVYVVGTVLR          | P04003                            |                                                                                                                                                                                               | /              | /           |
| CD5 antigen-like                       | LVGGLHR              | O43866                            |                                                                                                                                                                                               | /              | /           |
| Cholinesterase                         | YLTNTESTR            | P06276                            | <a href="https://labtestsonline.org/tests/cholinesterase-tests">https://labtestsonline.org/tests/cholinesterase-tests</a>                                                                     | /              | /           |

|                                                                        |                  |        |                                                                                                                               |      |     |
|------------------------------------------------------------------------|------------------|--------|-------------------------------------------------------------------------------------------------------------------------------|------|-----|
| Clusterin                                                              | ELDESLQVAER      | P10909 |                                                                                                                               | /    | /   |
| Coagulation factor X                                                   | TGIVSGFGR        | P00742 | <a href="https://labtestsonline.org/tests/coagulation-factors">https://labtestsonline.org/tests/coagulation-factors</a>       | 0187 | 40  |
| Coagulation factor XII                                                 | TEQAAVAR         | P00748 | <a href="https://labtestsonline.org/tests/coagulation-factors">https://labtestsonline.org/tests/coagulation-factors</a>       | /    | /   |
| Complement C1q subcomponent subunit B                                  | IAFSATR          | P02746 | <a href="https://labtestsonline.org/tests/complement">https://labtestsonline.org/tests/complement</a>                         | K194 | 70  |
| Complement C1q subcomponent subunit C                                  | FQSVFTVTR        | P02747 | <a href="https://labtestsonline.org/tests/complement">https://labtestsonline.org/tests/complement</a>                         | K194 | 70  |
| Complement C1r subcomponent                                            | GLTLHLK          | P00736 |                                                                                                                               | K196 | 100 |
| Complement C2                                                          | HAFILQDTK        | P06681 | <a href="https://labtestsonline.org/tests/complement">https://labtestsonline.org/tests/complement</a>                         | K196 | 100 |
| Complement C3                                                          | SGIPIVTSPYQIHFTK | P01024 | <a href="https://labtestsonline.org/tests/complement">https://labtestsonline.org/tests/complement</a>                         | 1811 | 25  |
| Complement C4-B                                                        | GSFEFPVGDAVSK    | P0C0L5 | <a href="https://labtestsonline.org/tests/complement">https://labtestsonline.org/tests/complement</a>                         | K194 | 70  |
| Complement C5                                                          | VFQFLEK          | P01031 |                                                                                                                               | K194 | 70  |
| Complement component C8 beta chain                                     | SDLEVAHYK        | P07358 |                                                                                                                               | K194 | 70  |
| Complement component C9                                                | LSPIYNLVPVK      | P02748 |                                                                                                                               | K194 | 70  |
| Complement factor D                                                    | THHDGAITER       | P00746 |                                                                                                                               | /    | /   |
| Complement factor I                                                    | HGNTDSEGIVEVK    | P05156 |                                                                                                                               | K194 | 70  |
| Corticosteroid-binding globulin                                        | ITQDAQLK         | P08185 |                                                                                                                               | /    | /   |
| C-reactive protein *                                                   | ESDTSYVSLK       | P02741 | <a href="https://labtestsonline.org/tests/c-reactive-protein-crp">https://labtestsonline.org/tests/c-reactive-protein-crp</a> | 1804 | 8   |
| Fibrinogen alpha chain                                                 | ESSSHHPGIAEFPSR  | P02671 | <a href="https://labtestsonline.org/tests/fibrinogen">https://labtestsonline.org/tests/fibrinogen</a>                         | 0174 | 15  |
| Fibulin-1                                                              | GYHLNEEGTR       | P23142 |                                                                                                                               | /    | /   |
| Gelsolin                                                               | AGALNSNDAFVLK    | P06396 |                                                                                                                               | /    | /   |
| Haptoglobin                                                            | DYAEVGR          | P00738 | <a href="https://labtestsonline.org/tests/haptoglobin">https://labtestsonline.org/tests/haptoglobin</a>                       | 1813 | 20  |
| Hemoglobin subunit alpha                                               | TYFPHFDSLHGSAQVK | P69905 | <a href="https://labtestsonline.org/tests/hemoglobin">https://labtestsonline.org/tests/hemoglobin</a>                         | /    | /   |
| Hemopexin                                                              | NFPSPVDAAFR      | P02790 |                                                                                                                               | /    | /   |
| Heparin cofactor 2                                                     | SVNDLYIQK        | P05546 | <a href="https://labtestsonline.org/tests/heparin-anti-xa">https://labtestsonline.org/tests/heparin-anti-xa</a>               | /    | /   |
| Insulin-like growth factor-binding protein 3                           | FLNVLSPR         | P17936 |                                                                                                                               | /    | /   |
| Insulin-like growth factor-binding protein complex acid labile subunit | LAELPADALGPLQR   | P35858 |                                                                                                                               | /    | /   |
| Inter-alpha-trypsin inhibitor heavy chain H2                           | FYNQVSTPLLR      | P19823 |                                                                                                                               | /    | /   |
| Lipopolysaccharide-binding protein                                     | ITLPDFTGDLR      | P18428 |                                                                                                                               | /    | /   |
| Lumican                                                                | FNALQYLR         | P51884 |                                                                                                                               | /    | /   |
| Neuropilin-2                                                           | ALQVVR           | O60462 |                                                                                                                               | /    | /   |
| Pigment epithelium-derived factor                                      | TVQAVLTVPK       | P36955 |                                                                                                                               | /    | /   |

|                               |               |        |                                                                                                                                                                                 |      |     |
|-------------------------------|---------------|--------|---------------------------------------------------------------------------------------------------------------------------------------------------------------------------------|------|-----|
| Prealbumin *                  | AADDTWEPFASGK | P02766 | <a href="https://labtestsonline.org/tests/prealbumin">https://labtestsonline.org/tests/prealbumin</a>                                                                           | 1817 | 19  |
| Protein AMBP                  | ETLLQDFR      | P02760 |                                                                                                                                                                                 | /    | /   |
| Prothrombin                   | ELLESYIDGR    | P00734 |                                                                                                                                                                                 | E086 | 140 |
| Retinol-binding protein 4     | YWGVASFLQK    | P02753 |                                                                                                                                                                                 | 1818 | 35  |
| Serum amyloid A-4 protein     | GNYDAAQR      | P35542 |                                                                                                                                                                                 | K162 | 70  |
| Thyroxine-binding globulin    | AVLHIGEK      | P05543 |                                                                                                                                                                                 | K109 | 150 |
| Transferrin                   | DGAGDVAQVK    | P02787 | <a href="https://labtestsonline.org/tests/transferrin-and-iron-binding-capacity-tibc-uibc">https://labtestsonline.org/tests/transferrin-and-iron-binding-capacity-tibc-uibc</a> | 1819 | 14  |
| Vitamin D-binding protein     | ELPEHTVK      | P02774 |                                                                                                                                                                                 | /    | /   |
| Vitamin K-dependent protein S | VYFAGFPR      | P07225 |                                                                                                                                                                                 | /    | /   |

**Table S2: List of the quantifications of the 62 proteins according to the different types of samples (plasma micro samples and Dried Blood Spots DBS) for each patient and expressed in z-score (cf Excel file Supplemental Table S2).**

**Table S3: List of proteins and analytical performance of microsample multiplex analyses**

Protein names, analytical values of the mass spectrometry including the lower limit of quantification (LOQ) as provided by the PeptiQuant™ Biomarker Assessment Kit (BAK-76) from CIL (Cambridge Isotope Laboratories, Tewksbury, Massachusetts) except the 5 proteins added on this assay. Intra and inter-assay coefficient of variations (CV in %) which is the ratio of the standard deviation to the mean were provided.

| Protein Name                          | Lower LOQ (ng/mL) | Intra-assay CV for plasma microsample | Intra-assay CV for DBS | Inter-assay CV using plasma QC |
|---------------------------------------|-------------------|---------------------------------------|------------------------|--------------------------------|
| Afamin                                | 314               | 8.0                                   | 11.1                   | 10.1                           |
| Albumin                               | 266               | 17.7                                  | 9.2                    | 13.5                           |
| Alpha-1-acid glycoprotein 1 (AAG)     | 33600             | 1.6                                   | 1.2                    | 12.4                           |
| Alpha-1-antichymotrypsin              | 4633              | 2.2                                   | 2.8                    | 1.8                            |
| Alpha-1B-glycoprotein                 | 2085              | 2.4                                   | 2.0                    | 1.3                            |
| Alpha-2-antiplasmin                   | 300               | 2.4                                   | 4.4                    | 2.0                            |
| Alpha-2-HS-glycoprotein               | 1314              | 1.6                                   | 1.5                    | 2.3                            |
| Alpha-2-macroglobulin                 | 61976             | 1.7                                   | 2.1                    | 1.5                            |
| Antithrombin-III                      | 2862              | 10.2                                  | 11.4                   | 6.1                            |
| Apolipoprotein A-I                    | 12365             | 2.8                                   | 2.2                    | 1.6                            |
| Apolipoprotein A-IV                   | 1842              | 4.7                                   | 3.3                    | 13.6                           |
| Apolipoprotein B-100                  | 88601             | 1.4                                   | 3.1                    | 2.5                            |
| Apolipoprotein C-II                   | 55                | 6.6                                   | 5.2                    | 18.4                           |
| Apolipoprotein D                      | 2167              | 2.7                                   | 1.6                    | 2.1                            |
| Apolipoprotein E                      | 1763              | 2.0                                   | 2.0                    | 1.7                            |
| Apolipoprotein M                      | 2259              | 2.6                                   | 3.4                    | 2.3                            |
| Apolipoprotein(a)                     | 1288              | 6.8                                   | 9.4                    | 14.4                           |
| Beta-2-glycoprotein 1                 | 584               | 3.0                                   | 1.7                    | 6.7                            |
| Beta-2-microglobulin                  | 145               | 8.3                                   | 13.8                   | 22.4                           |
| Beta-Ala-His dipeptidase              | 406               | 6.0                                   | 4.4                    | NA                             |
| C4b-binding protein alpha chain       | 2100              | 9.0                                   | 4.5                    | 7.0                            |
| CD5 antigen-like                      | 406               | 3.4                                   | 5.4                    | 7.1                            |
| Cholinesterase                        | 809               | 9.9                                   | 12.9                   | 6.6                            |
| Clusterin                             | 67381             | 2.1                                   | 2.6                    | 5.1                            |
| Coagulation factor X                  | 95                | 3.6                                   | 3.5                    | 3.8                            |
| Coagulation factor XII                | 1664              | 5.3                                   | 7.7                    | 1.5                            |
| Complement C1q subcomponent subunit B | 137               | 2.4                                   | 3.3                    | NA                             |
| Complement C1q subcomponent subunit C | 4023              | 4.6                                   | 5.3                    | 3.5                            |
| Complement C1r subcomponent           | 302               | 7.0                                   | 4.8                    | 7.7                            |
| Complement C2                         | 396               | 8.4                                   | 12.7                   | 11.0                           |
| Complement C3                         | 238216            | 2.1                                   | 2.7                    | 2.9                            |
| Complement C4-B                       | 5353              | 4.0                                   | 2.6                    | 2.6                            |
| Complement C5                         | 781               | 5.1                                   | 19.0                   | 4.4                            |
| Complement component C8 beta chain    | 100               | 8.2                                   | 5.9                    | 6.2                            |
| Complement component C9               | 1470              | 4.5                                   | 2.1                    | 2.2                            |
| Complement factor D                   | 306               | 4.1                                   | 7.4                    | 3.0                            |
| Complement factor I                   | 945               | 4.5                                   | 3.9                    | 5.9                            |
| Corticosteroid-binding globulin       | 406               | 2.6                                   | 6.6                    | 6.7                            |

|                                                                        |       |      |      |      |
|------------------------------------------------------------------------|-------|------|------|------|
| C-reactive protein                                                     | 251   | 3.8  | 6.6  | 5.7  |
| Fibrinogen alpha chain                                                 | 26190 | 2.7  | 1.7  | 1.4  |
| Fibulin-1                                                              | 162   | 6.0  | 6.6  | 8.6  |
| Gelsolin                                                               | 2034  | 4.9  | 4.4  | 3.3  |
| Haptoglobin                                                            | 328   | 2.7  | 2.8  | 9.4  |
| Hemoglobin subunit alpha                                               | 7370  | 20.3 | 10.9 | 6.0  |
| Hemopexin                                                              | 11896 | 1.9  | 1.4  | 2.2  |
| Heparin cofactor 2                                                     | 735   | 1.6  | 2.3  | 2.8  |
| Insulin-like growth factor-binding protein 3                           | 98    | 3.1  | 10.4 | 2.4  |
| Insulin-like growth factor-binding protein complex acid labile subunit | 2394  | 5.7  | 7.8  | 5.0  |
| Inter-alpha-trypsin inhibitor heavy chain H2                           | 7037  | 2.6  | 4.0  | 2.1  |
| Lipopolysaccharide-binding protein                                     | 469   | 8.4  | 8.9  | 10.0 |
| Lumican                                                                | 742   | 2.4  | 3.0  | 3.6  |
| Neuropilin-2                                                           | 112   | 4.7  | 5.4  | 9.1  |
| Pigment epithelium-derived factor                                      | 3107  | 2.8  | 4.3  | 3.1  |
| Prealbumin                                                             | 2752  | 3.2  | 2.8  | 10.3 |
| Protein AMBP                                                           | 1546  | 2.6  | 3.5  | 4.0  |
| Prothrombin                                                            | 18014 | 6.4  | 8.4  | 5.2  |
| Retinol-binding protein 4                                              | 1476  | 3.5  | 4.0  | 3.9  |
| Serum amyloid A-4 protein                                              | 135   | 2.7  | 2.8  | 5.0  |
| Thyroxine-binding globulin                                             | 110   | 3.8  | 3.4  | 3.8  |
| Transferrin                                                            | 4833  | 1.6  | 1.6  | 1.9  |
| Vitamin D-binding protein                                              | 3819  | 2.8  | 2.3  | 4.2  |
| Vitamin K-dependent protein S                                          | 1266  | 2.9  | 6.6  | 2.6  |

**Table S4: Descriptive and statistic results when comparing low IADL group to high IADL group. Abbreviations: Dried Blood Spots (DBS), Instrumental Activities of Daily Living (IADL)**

| Variable                                                                  | IADL<5 |        |              | IADL>=5 |        |              | P <sup>a</sup> |
|---------------------------------------------------------------------------|--------|--------|--------------|---------|--------|--------------|----------------|
|                                                                           | n      | Median | Average Rank | n       | Median | Average Rank |                |
| Apolipoprotein D DBS                                                      | 23     | 0.544  | 23.739       | 15      | 0.400  | 13           | 0.0029         |
| Apolipoprotein D Plasma                                                   | 23     | 5.375  | 23.435       | 15      | 3.603  | 13.467       | 0.0061         |
| Apolipoprotein E DBS                                                      | 23     | 0.538  | 23.087       | 15      | 0.442  | 14           | 0.0130         |
| Apolipoprotein E Plasma                                                   | 23     | 6.520  | 22.304       | 15      | 4.884  | 15.200       | 0.0552         |
| Alpha-2-macroglobulin DBS                                                 | 23     | 0.484  | 17.391       | 15      | 0.573  | 22.733       | 0.1534         |
| Alpha-2-macroglobulin Plasma                                              | 23     | 6.407  | 15.652       | 15      | 7.802  | 25.400       | 0.0074         |
| Insulin growth factor-binding protein complex acide labile subunit DBS    | 23     | 0.344  | 22.696       | 15      | 0.205  | 14.600       | 0.0280         |
| Insulin growth factor-binding protein complex acide labile subunit Plasma | 23     | 4.603  | 20.870       | 15      | 3.562  | 17.400       | 0.3590         |
| Apolipoprotein(a) DBS                                                     | 23     | 1.613  | 20.696       | 15      | 1.558  | 17.667       | 0.4247         |
| Apolipoprotein(a) Plasma                                                  | 23     | 6.338  | 20.696       | 15      | 4.859  | 17.667       | 0.4247         |
| Apolipoprotein M DBS                                                      | 23     | 1.151  | 21.870       | 15      | 1.010  | 15.867       | 0.1074         |
| Apolipoprotein M Plasma                                                   | 23     | 4.053  | 22           | 15      | 3.607  | 15.667       | 0.0889         |
| Beta-2-glycoprotein 1 DBS                                                 | 23     | 0.774  | 18.783       | 15      | 0.893  | 20.600       | 0.6368         |
| Beta-2-glycoprotein 1 Plasma                                              | 23     | 11.305 | 19.130       | 15      | 10.568 | 20.067       | 0.8135         |
| Beta-2-microglobulin DBS                                                  | 23     | 0.469  | 19.652       | 15      | 0.467  | 19.267       | 0.9295         |
| Beta-2-microglobulin Plasma                                               | 23     | 7.163  | 19.956       | 15      | 5.936  | 18.800       | 0.7680         |
| Beta-Ala-His_dipeptidase DBS                                              | 23     | 0.934  | 18.739       | 15      | 0.976  | 20.667       | 0.6158         |
| Beta-Ala-His_dipeptidase Plasma                                           | 23     | 5.634  | 17.261       | 15      | 8.022  | 22.933       | 0.1289         |



|                                                     |    |        |        |    |        |        |        |
|-----------------------------------------------------|----|--------|--------|----|--------|--------|--------|
| <b>C4b-binding_protein_alpha_chain DBS</b>          | 23 | 2.037  | 19.217 | 15 | 1.891  | 19.933 | 0.8596 |
| <b>C4b-binding_protein_alpha_chain Plasma</b>       | 23 | 10.469 | 18.435 | 15 | 11.627 | 21.133 | 0.4782 |
| <b>CD5_antigen-like DBS</b>                         | 23 | 0.217  | 19.783 | 15 | 0.195  | 19.067 | 0.8596 |
| <b>CD5_antigen-like Plasma</b>                      | 23 | 3.106  | 19.043 | 15 | 3.460  | 20.200 | 0.7680 |
| <b>Cholinesterase DBS</b>                           | 23 | 0.396  | 17.043 | 15 | 0.677  | 23.267 | 0.0947 |
| <b>Cholinesterase Plasma</b>                        | 23 | 5.812  | 18.609 | 15 | 5.673  | 20.867 | 0.5548 |
| <b>Clusterin DBS</b>                                | 23 | 6.298  | 19.783 | 15 | 6.556  | 19.067 | 0.8596 |
| <b>Clusterin Plasma</b>                             | 23 | 36.568 | 18.826 | 15 | 36.981 | 20.533 | 0.6580 |
| <b>Coagulation_factor_X DBS</b>                     | 23 | 0.314  | 20.217 | 15 | 0.323  | 18.400 | 0.6368 |
| <b>Coagulation_factor_X Plasma</b>                  | 23 | 3.408  | 20.391 | 15 | 3.224  | 18.133 | 0.5548 |
| <b>Coagulation_factor_XII DBS</b>                   | 23 | 0.612  | 19.783 | 15 | 0.580  | 19.067 | 0.8596 |
| <b>Coagulation_factor_XII Plasma</b>                | 23 | 3.846  | 19.609 | 15 | 3.829  | 19.333 | 0.9530 |
| <b>Complement_C1q_subcomponent_subunit_B DBS</b>    | 23 | 0.385  | 18.348 | 15 | 0.499  | 21.267 | 0.4422 |
| <b>Complement_C1q_subcomponent_subunit_B Plasma</b> | 23 | 9.603  | 19.956 | 15 | 9.226  | 18.800 | 0.7680 |
| <b>Complement_C1q_subcomponent_subunit_C DBS</b>    | 23 | 0.404  | 18.870 | 15 | 0.420  | 20.467 | 0.6796 |
| <b>Complement_C1q_subcomponent_subunit_C Plasma</b> | 23 | 12.897 | 19.783 | 15 | 12.970 | 19.067 | 0.8596 |
| <b>Complement_C1r_subcomponent DBS</b>              | 23 | 0.931  | 20.174 | 15 | 0.868  | 18.467 | 0.6580 |
| <b>Complement_C1r_subcomponent Plasma</b>           | 23 | 11.523 | 19.087 | 15 | 11.265 | 20.133 | 0.7907 |
| <b>Complement_C2 DBS</b>                            | 23 | 2.023  | 21.043 | 15 | 1.742  | 17.133 | 0.2999 |

|                                           |    |        |        |    |        |        |        |
|-------------------------------------------|----|--------|--------|----|--------|--------|--------|
| Complement_C2 Plasma                      | 23 | 10.219 | 20.435 | 15 | 9.892  | 18.067 | 0.5351 |
| Complement_C3 DBS                         | 23 | 0.541  | 19.826 | 15 | 0.547  | 19     | 0.8365 |
| Complement_C3 Plasma                      | 23 | 7.086  | 19.348 | 15 | 7.052  | 19.733 | 0.9295 |
| Complement_C4-B DBS                       | 23 | 0.926  | 21.609 | 15 | 0.789  | 16.267 | 0.1534 |
| Complement_C4-B Plasma                    | 23 | 12.071 | 21.696 | 15 | 10.492 | 16.133 | 0.1367 |
| Complement_C5 DBS                         | 23 | 0.663  | 19.522 | 15 | 0.697  | 19.467 | 1      |
| Complement_C5 Plasma                      | 23 | 6.914  | 19.522 | 15 | 6.873  | 19.467 | 1      |
| Complement_component_C8_beta_chain DBS    | 23 | 0.887  | 19.826 | 15 | 0.824  | 19     | 0.8365 |
| Complement_component_C8_beta_chain Plasma | 23 | 8.654  | 18.304 | 15 | 9.708  | 21.333 | 0.4247 |
| Complement_component_C9 DBS               | 23 | 0.741  | 19.043 | 15 | 0.751  | 20.200 | 0.7680 |
| Complement_component_C9 Plasma            | 23 | 6.004  | 19.391 | 15 | 5.862  | 19.667 | 0.9530 |
| Complement_factor_D_DBs                   | 23 | 0.157  | 19.565 | 15 | 0.159  | 19.400 | 0.9765 |
| Complement_factor_D_Plasma                | 23 | 1.162  | 19.174 | 15 | 1.202  | 20     | 0.8365 |
| Complement_factor_I_DBs                   | 23 | 0.162  | 21.348 | 15 | 0.136  | 16.667 | 0.2126 |
| Complement_factor_I_Plasma                | 23 | 1.304  | 21.652 | 15 | 0.979  | 16.200 | 0.1449 |
| Corticosteroid-binding_globulin_DBs       | 23 | 0.251  | 19.435 | 15 | 0.241  | 19.600 | 0.9765 |
| Corticosteroid-binding_globulin_Plasma    | 23 | 4.052  | 20.870 | 15 | 3.828  | 17.400 | 0.359  |
| C Reactive Protein DBS                    | 23 | 0.056  | 22     | 15 | 0.028  | 15.667 | 0.0889 |
| C Reactive Protein Plasma                 | 23 | 0.614  | 21     | 15 | 0.355  | 17.200 | 0.314  |

|                                                            |    |          |        |    |          |        |        |
|------------------------------------------------------------|----|----------|--------|----|----------|--------|--------|
| <b>Fibrinogen_alpha_chain DBS</b>                          | 23 | 1.342    | 18.652 | 15 | 1.376    | 20.800 | 0.5748 |
| <b>Fibrinogen_alpha_chain Plasma</b>                       | 23 | 13.097   | 18.087 | 15 | 15.266   | 21.667 | 0.3436 |
| <b>Fibulin-1 DBS</b>                                       | 23 | 0.704    | 20.130 | 15 | 0.585    | 18.533 | 0.6796 |
| <b>Fibulin-1 Plasma</b>                                    | 23 | 6.487    | 20.696 | 15 | 6.565    | 17.667 | 0.4247 |
| <b>Gelsolin DBS</b>                                        | 23 | 1.179    | 19.391 | 15 | 1.168    | 19.667 | 0.953  |
| <b>Gelsolin Plasma</b>                                     | 23 | 4.183    | 20.261 | 15 | 3.993    | 18.333 | 0.6158 |
| <b>Haptoglobin DBS</b>                                     | 23 | 8.477    | 21.217 | 15 | 7.230    | 16.867 | 0.2475 |
| <b>Haptoglobin Plasma</b>                                  | 23 | 90.798   | 20.739 | 15 | 62.836   | 17.600 | 0.4077 |
| <b>Hemoglobin_subunit_alpha DBS</b>                        | 23 | 1110.223 | 20.130 | 15 | 1101.770 | 18.533 | 0.6796 |
| <b>Hemoglobin_subunit_alpha Plasma</b>                     | 23 | 3.916    | 20     | 15 | 2.847    | 18.733 | 0.7456 |
| <b>Heparin_cofactor_ DBS</b>                               | 23 | 1.276    | 18.956 | 15 | 1.389    | 20.333 | 0.7233 |
| <b>Heparin_cofactor_Plasma</b>                             | 23 | 16.244   | 19.174 | 15 | 16.568   | 20     | 0.8365 |
| <b>Insulin-like_growth_factor-binding_protein_3_ DBS</b>   | 23 | 0.470    | 20.087 | 15 | 0.452    | 18.600 | 0.7013 |
| <b>Insulin-like_growth_factor-binding_protein_3_Plasma</b> | 23 | 2.996    | 20.130 | 15 | 2.828    | 18.533 | 0.6796 |
| <b>Inter-alpha-trypsin_inhibitor_heavy_chain_H2 DBS</b>    | 23 | 1.216    | 19.956 | 15 | 1.338    | 18.800 | 0.7680 |
| <b>Inter-alpha-trypsin_inhibitor_heavy_chain_H2 Plasma</b> | 23 | 8.130    | 20.739 | 15 | 8.104    | 17.600 | 0.4077 |

|                                                  |    |        |        |    |        |        |        |
|--------------------------------------------------|----|--------|--------|----|--------|--------|--------|
| <b>Lipopolysaccharide-binding_protein_DBS</b>    | 23 | 2.199  | 19.956 | 15 | 2.123  | 18.800 | 0.7680 |
| <b>Lipopolysaccharide-binding_protein_Plasma</b> | 23 | 46.817 | 19.913 | 15 | 47.120 | 18.867 | 0.7907 |
| <b>Lumican_DBS</b>                               | 23 | 4.869  | 18.956 | 15 | 5.230  | 20.333 | 0.7233 |
| <b>Lumican_Plasma</b>                            | 23 | 3.344  | 18.130 | 15 | 3.440  | 21.600 | 0.3590 |
| <b>Neuropilin-2_DBS</b>                          | 23 | 0.271  | 20.435 | 15 | 0.251  | 18.067 | 0.5351 |
| <b>Neuropilin-2_Plasma</b>                       | 23 | 3.520  | 20.522 | 15 | 3.281  | 17.933 | 0.4968 |
| <b>Alpha-1-acid glycoprotein 1 DBS</b>           | 23 | 0.351  | 19.913 | 15 | 0.348  | 18.867 | 0.7907 |
| <b>Alpha-1-acid glycoprotein 1 Plasma</b>        | 23 | 6.802  | 21.826 | 15 | 6.355  | 15.933 | 0.1143 |
| <b>Pigment epithelium-derived factor DBS</b>     | 23 | 0.038  | 20.652 | 15 | 0.033  | 17.733 | 0.4422 |
| <b>Pigment epithelium-derived factor Plasma</b>  | 23 | 0.211  | 20.261 | 15 | 0.201  | 18.333 | 0.6158 |
| <b>Protein_AMBP DBS</b>                          | 23 | 0.789  | 20.261 | 15 | 0.636  | 18.333 | 0.6158 |
| <b>Protein_AMBP Plasma</b>                       | 23 | 5.439  | 19.739 | 15 | 5.242  | 19.133 | 0.8828 |
| <b>Prothrombin DBS</b>                           | 23 | 0.421  | 19.826 | 15 | 0.451  | 19     | 0.8365 |
| <b>Prothrombin Plasma</b>                        | 23 | 3.805  | 21.130 | 15 | 3.509  | 17     | 0.2729 |
| <b>Transferrin DBS</b>                           | 23 | 2.330  | 20.478 | 15 | 2.271  | 18     | 0.5158 |
| <b>Transferrin Plasma</b>                        | 23 | 26.980 | 20.087 | 15 | 22.501 | 18.600 | 0.7013 |
| <b>Serum_amyloid_A-4_protein DBS</b>             | 23 | 2.476  | 21.913 | 15 | 1.903  | 15.800 | 0.1009 |
| <b>Serum_amyloid_A-4_protein Plasma</b>          | 23 | 11.938 | 21.348 | 15 | 8.433  | 16.667 | 0.2126 |
| <b>Retinol-binding protein 4 DBS</b>             | 23 | 1.570  | 19.217 | 15 | 1.938  | 19.933 | 0.8596 |
| <b>Retinol-binding protein 4 Plasma</b>          | 23 | 54.673 | 19.478 | 15 | 48.323 | 19.533 | 1      |
| <b>Hemopexin DBS</b>                             | 23 | 2.810  | 19.348 | 15 | 2.552  | 19.733 | 0.9295 |

|                                             |    |        |        |    |        |        |        |
|---------------------------------------------|----|--------|--------|----|--------|--------|--------|
| <b>Hemopexin Plasma</b>                     | 23 | 28.835 | 18.826 | 15 | 29.084 | 20.533 | 0.6580 |
| <b>Thyroxine-binding_globulin DBS</b>       | 23 | 0.462  | 19.043 | 15 | 0.454  | 20.200 | 0.7680 |
| <b>Thyroxine-binding_globulin Plasma</b>    | 23 | 4.014  | 17.783 | 15 | 4.113  | 22.133 | 0.2475 |
| <b>Transthyretin DBS</b>                    | 23 | 3.655  | 19.652 | 15 | 3.235  | 19.267 | 0.9295 |
| <b>Transthyretin Plasma</b>                 | 23 | 2.743  | 19.609 | 15 | 2.900  | 19.333 | 0.9530 |
| <b>Vitamin_D-binding_protein DBS</b>        | 23 | 0.509  | 20.217 | 15 | 0.482  | 18.400 | 0.6368 |
| <b>Vitamin_D-binding_protein Plasma</b>     | 23 | 3.549  | 19.826 | 15 | 3.570  | 19     | 0.8365 |
| <b>Vitamin_K-dependent_protein_S DBS</b>    | 23 | 0.407  | 19.913 | 15 | 0.384  | 18.867 | 0.7907 |
| <b>Vitamin_K-dependent_protein_S Plasma</b> | 23 | 5.297  | 19.609 | 15 | 5.883  | 19.333 | 0.9530 |

<sup>a</sup> Mann-Whitney test

MedCalc® Statistical Software version 20.210 (MedCalc Software Ltd, Ostend, Belgium; <https://www.medcalc.org>; 2022)

### Table S5: Optimized collision energy for the different peptide ions.

Protein name and corresponding peptide on endogenous form (.light) or isotopically labelled (.heavy). On each peptide transition parameters were indicated: precursor ion, fragment ion, collision energy used to generate this fragmentation and the indication of the fragment ion type. In addition, the retention time of the peptide was indicated.

| Protein                 | Peptide             | Precursor Ion (m/z) | Product Ion (m/z) | Collision Energy (V) | Ion Type | Retention Time (min) | Collision Energy | Ret Time (min) | Delta Ret Time | Ion Name |
|-------------------------|---------------------|---------------------|-------------------|----------------------|----------|----------------------|------------------|----------------|----------------|----------|
| Afamin                  | DADPDTFFAK.light    | 563,76              | 302,10            | -22                  | b3       | 20                   | -22              | 20             | 3              | b3       |
| Afamin                  | DADPDTFFAK.light    | 563,76              | 825,41            | -22                  | y7       | 20                   | -22              | 20             | 3              | y7       |
| Afamin                  | DADPDTFFAK.light    | 563,76              | 413,21            | -22                  | y7       | 20                   | -22              | 20             | 3              | y7       |
| Afamin                  | DADPDTFFAK.heavy    | 567,76              | 302,10            | -22                  | b3       | 20                   | -22              | 20             | 3              | b3       |
| Afamin                  | DADPDTFFAK.heavy    | 567,76              | 833,43            | -22                  | y7       | 20                   | -22              | 20             | 3              | y7       |
| Afamin                  | DADPDTFFAK.heavy    | 567,76              | 417,22            | -22                  | y7       | 20                   | -22              | 20             | 3              | y7       |
| Alpha-1B-glycoprotein   | GVTFLLR.light       | 403,25              | 649,40            | -16                  | y5       | 25                   | -16              | 25             | 3              | y5       |
| Alpha-1B-glycoprotein   | GVTFLLR.light       | 403,25              | 401,29            | -16                  | y3       | 25                   | -16              | 25             | 3              | y3       |
| Alpha-1B-glycoprotein   | GVTFLLR.light       | 403,25              | 325,21            | -16                  | y5       | 25                   | -16              | 25             | 3              | y5       |
| Alpha-1B-glycoprotein   | GVTFLLR.heavy       | 408,25              | 659,41            | -16                  | y5       | 25                   | -16              | 25             | 3              | y5       |
| Alpha-1B-glycoprotein   | GVTFLLR.heavy       | 408,25              | 411,30            | -16                  | y3       | 25                   | -16              | 25             | 3              | y3       |
| Alpha-1B-glycoprotein   | GVTFLLR.heavy       | 408,25              | 330,21            | -16                  | y5       | 25                   | -16              | 25             | 3              | y5       |
| Alpha-1B-glycoprotein   | LETPDFQLFK.light    | 619,33              | 894,47            | -24                  | y7       | 33                   | -24              | 33             | 3              | y7       |
| Alpha-1B-glycoprotein   | LETPDFQLFK.light    | 619,33              | 498,26            | -24                  | y8       | 33                   | -24              | 33             | 3              | y8       |
| Alpha-1B-glycoprotein   | LETPDFQLFK.light    | 619,33              | 447,74            | -24                  | y7       | 33                   | -24              | 33             | 3              | y7       |
| Alpha-1B-glycoprotein   | LETPDFQLFK.light    | 619,33              | 344,18            | -24                  | b3       | 33                   | -24              | 33             | 3              | b3       |
| Alpha-1B-glycoprotein   | LETPDFQLFK.heavy    | 623,33              | 902,49            | -24                  | y7       | 33                   | -24              | 33             | 3              | y7       |
| Alpha-1B-glycoprotein   | LETPDFQLFK.heavy    | 623,33              | 502,27            | -24                  | y8       | 33                   | -24              | 33             | 3              | y8       |
| Alpha-1B-glycoprotein   | LETPDFQLFK.heavy    | 623,33              | 451,75            | -24                  | y7       | 33                   | -24              | 33             | 3              | y7       |
| Alpha-1B-glycoprotein   | LETPDFQLFK.heavy    | 623,33              | 344,18            | -24                  | b3       | 33                   | -24              | 33             | 3              | b3       |
| sp P08697 A2AP_HUMAN    | LGNQEPGGQTALK.light | 656,85              | 771,44            | -26                  | y8       | 9                    | -26              | 9              | 3              | y8       |
| sp P08697 A2AP_HUMAN    | LGNQEPGGQTALK.light | 656,85              | 285,16            | -26                  | b3       | 9                    | -26              | 9              | 3              | b3       |
| sp P08697 A2AP_HUMAN    | LGNQEPGGQTALK.light | 656,85              | 413,21            | -26                  | b4       | 9                    | -26              | 9              | 3              | b4       |
| sp P08697 A2AP_HUMAN    | LGNQEPGGQTALK.light | 656,85              | 542,26            | -26                  | b5       | 9                    | -26              | 9              | 3              | b5       |
| sp P08697 A2AP_HUMAN    | LGNQEPGGQTALK.heavy | 660,85              | 779,45            | -26                  | y8       | 9                    | -26              | 9              | 3              | y8       |
| sp P08697 A2AP_HUMAN    | LGNQEPGGQTALK.heavy | 660,85              | 285,16            | -26                  | b3       | 9                    | -26              | 9              | 3              | b3       |
| sp P08697 A2AP_HUMAN    | LGNQEPGGQTALK.heavy | 660,85              | 413,21            | -26                  | b4       | 9                    | -26              | 9              | 3              | b4       |
| sp P08697 A2AP_HUMAN    | LGNQEPGGQTALK.heavy | 660,85              | 542,26            | -26                  | b5       | 9                    | -26              | 9              | 3              | b5       |
| Alpha-2-HS-glycoprotein | FSVVYAK.light       | 407,23              | 235,11            | -16                  | b2       | 16                   | -16              | 16             | 3              | b2       |

|                         |                   |        |        |     |     |    |     |    |   |     |
|-------------------------|-------------------|--------|--------|-----|-----|----|-----|----|---|-----|
| Alpha-2-HS-glycoprotein | FSVVYAK.light     | 407,23 | 666,38 | -16 | y6  | 16 | -16 | 16 | 3 | y6  |
| Alpha-2-HS-glycoprotein | FSVVYAK.light     | 407,23 | 579,35 | -16 | y5  | 16 | -16 | 16 | 3 | y5  |
| Alpha-2-HS-glycoprotein | FSVVYAK.heavy     | 411,24 | 235,11 | -16 | b2  | 16 | -16 | 16 | 3 | b2  |
| Alpha-2-HS-glycoprotein | FSVVYAK.heavy     | 411,24 | 674,40 | -16 | y6  | 16 | -16 | 16 | 3 | y6  |
| Alpha-2-HS-glycoprotein | FSVVYAK.heavy     | 411,24 | 587,36 | -16 | y5  | 16 | -16 | 16 | 3 | y5  |
| Alpha-2-macroglobulin   | AIGYLNTGYQR.light | 628,33 | 851,44 | -25 | y7  | 17 | -25 | 17 | 3 | y7  |
| Alpha-2-macroglobulin   | AIGYLNTGYQR.light | 628,33 | 738,35 | -25 | y6  | 17 | -25 | 17 | 3 | y6  |
| Alpha-2-macroglobulin   | AIGYLNTGYQR.light | 628,33 | 242,15 | -25 | b3  | 17 | -25 | 17 | 3 | b3  |
| Alpha-2-macroglobulin   | AIGYLNTGYQR.heavy | 633,33 | 242,15 | -25 | b3  | 17 | -25 | 17 | 3 | b3  |
| Alpha-2-macroglobulin   | AIGYLNTGYQR.heavy | 633,33 | 861,45 | -25 | y7  | 17 | -25 | 17 | 3 | y7  |
| Alpha-2-macroglobulin   | AIGYLNTGYQR.heavy | 633,33 | 748,36 | -25 | y6  | 17 | -25 | 17 | 3 | y6  |
| sp P01008 ANT3_HUMAN    | DDLTVSDFHK.light  | 437,21 | 540,28 | -15 | y9  | 19 | -15 | 19 | 3 | y9  |
| sp P01008 ANT3_HUMAN    | DDLTVSDFHK.light  | 437,21 | 483,74 | -15 | y8  | 19 | -15 | 19 | 3 | y8  |
| sp P01008 ANT3_HUMAN    | DDLTVSDFHK.light  | 437,21 | 402,21 | -15 | y7  | 19 | -15 | 19 | 3 | y7  |
| sp P01008 ANT3_HUMAN    | DDLTVSDFHK.light  | 437,21 | 231,06 | -15 | b2  | 19 | -15 | 19 | 3 | b2  |
| sp P01008 ANT3_HUMAN    | DDLTVSDFHK.heavy  | 439,88 | 544,29 | -15 | y9  | 19 | -15 | 19 | 3 | y9  |
| sp P01008 ANT3_HUMAN    | DDLTVSDFHK.heavy  | 439,88 | 487,74 | -15 | y8  | 19 | -15 | 19 | 3 | y8  |
| sp P01008 ANT3_HUMAN    | DDLTVSDFHK.heavy  | 439,88 | 406,21 | -15 | y7  | 19 | -15 | 19 | 3 | y7  |
| sp P01008 ANT3_HUMAN    | DDLTVSDFHK.heavy  | 439,88 | 231,06 | -15 | b2  | 19 | -15 | 19 | 3 | b2  |
| Apolipoprotein(a)       | GTSTTVTGR.light   | 521,76 | 721,38 | -20 | y7  | 7  | -20 | 7  | 3 | y7  |
| Apolipoprotein(a)       | GTSTTVTGR.light   | 521,76 | 432,26 | -20 | y4  | 7  | -20 | 7  | 3 | y4  |
| Apolipoprotein(a)       | GTSTTVTGR.light   | 521,76 | 442,73 | -20 | y8  | 7  | -20 | 7  | 3 | y8  |
| Apolipoprotein(a)       | GTSTTVTGR.heavy   | 526,77 | 731,39 | -20 | y7  | 7  | -20 | 7  | 3 | y7  |
| Apolipoprotein(a)       | GTSTTVTGR.heavy   | 526,77 | 442,26 | -20 | y4  | 7  | -20 | 7  | 3 | y4  |
| Apolipoprotein(a)       | GTSTTVTGR.heavy   | 526,77 | 447,73 | -20 | y8  | 7  | -20 | 7  | 3 | y8  |
| sp P02647 APOA1_HUMAN   | ATEHLSTLSEK.light | 405,88 | 664,35 | -14 | y6  | 8  | -14 | 8  | 3 | y6  |
| sp P02647 APOA1_HUMAN   | ATEHLSTLSEK.light | 405,88 | 572,80 | -14 | y10 | 8  | -14 | 8  | 3 | y10 |
| sp P02647 APOA1_HUMAN   | ATEHLSTLSEK.light | 405,88 | 522,27 | -14 | y9  | 8  | -14 | 8  | 3 | y9  |
| sp P02647 APOA1_HUMAN   | ATEHLSTLSEK.light | 405,88 | 457,75 | -14 | y8  | 8  | -14 | 8  | 3 | y8  |
| sp P02647 APOA1_HUMAN   | ATEHLSTLSEK.heavy | 408,55 | 672,37 | -14 | y6  | 8  | -14 | 8  | 3 | y6  |
| sp P02647 APOA1_HUMAN   | ATEHLSTLSEK.heavy | 408,55 | 576,80 | -14 | y10 | 8  | -14 | 8  | 3 | y10 |
| sp P02647 APOA1_HUMAN   | ATEHLSTLSEK.heavy | 408,55 | 526,28 | -14 | y9  | 8  | -14 | 8  | 3 | y9  |

|                       |                       |        |        |       |     |       |       |       |   |     |
|-----------------------|-----------------------|--------|--------|-------|-----|-------|-------|-------|---|-----|
| sp P02647 APOA1_HUMAN | ATEHLSTLSEK.heavy     | 408,55 | 461,76 | -14   | y8  | 8     | -14   | 8     | 3 | y8  |
| P06727_APOA4_HUMAN    | LLPHANEVSQK.light     | 412,56 | 227,18 | -14   | b2  | 9     | -14   | 9     | 3 | b2  |
| P06727_APOA4_HUMAN    | LLPHANEVSQK.light     | 412,56 | 231,15 | -14   | b4  | 9     | -14   | 9     | 3 | b4  |
| P06727_APOA4_HUMAN    | LLPHANEVSQK.light     | 412,56 | 456,73 | -14   | y8  | 9     | -14   | 9     | 3 | y8  |
| P06727_APOA4_HUMAN    | LLPHANEVSQK.heavy     | 415,23 | 460,74 | -14   | y8  | 9     | -14   | 9     | 3 | y8  |
| P06727_APOA4_HUMAN    | LLPHANEVSQK.heavy     | 415,23 | 235,15 | -14   | y4  | 9     | -14   | 9     | 3 | y4  |
| P06727_APOA4_HUMAN    | LLPHANEVSQK.heavy     | 415,23 | 227,18 | -14   | b2  | 9     | -14   | 9     | 3 | b2  |
| ApoB100               | TGISPLALIK.light      | 506,82 | 272,16 | -20   | b3  | 32    | -20   | 32    | 3 | b3  |
| ApoB100               | TGISPLALIK.light      | 506,82 | 741,49 | -20   | y7  | 32    | -20   | 32    | 3 | y7  |
| ApoB100               | TGISPLALIK.light      | 506,82 | 654,45 | -20   | y6  | 32    | -20   | 32    | 3 | y6  |
| ApoB100               | TGISPLALIK.heavy      | 510,83 | 272,16 | -20   | b3  | 32    | -20   | 32    | 3 | b3  |
| ApoB100               | TGISPLALIK.heavy      | 510,83 | 749,50 | -20   | y7  | 32    | -20   | 32    | 3 | y7  |
| ApoB100               | TGISPLALIK.heavy      | 510,83 | 662,47 | -20   | y6  | 32    | -20   | 32    | 3 | y6  |
| ApoC2                 | TAAQNLYEK.light       | 519,27 | 173,09 | -20   | b2  | 8     | -20   | 8     | 3 | b2  |
| ApoC2                 | TAAQNLYEK.light       | 519,27 | 865,44 | -20   | y7  | 8     | -20   | 8     | 3 | y7  |
| ApoC2                 | TAAQNLYEK.light       | 519,27 | 666,35 | -20   | y5  | 8     | -20   | 8     | 3 | y5  |
| ApoC2                 | TAAQNLYEK.heavy       | 523,27 | 173,09 | -20   | b2  | 8     | -20   | 8     | 3 | b2  |
| ApoC2                 | TAAQNLYEK.heavy       | 523,27 | 873,46 | -20   | y7  | 8     | -20   | 8     | 3 | y7  |
| ApoC2                 | TAAQNLYEK.heavy       | 523,27 | 674,36 | -20   | y5  | 8     | -20   | 8     | 3 | y5  |
| ApoE                  | LGPLVEQGR.light       | 484,78 | 588,31 | -19   | y5  | 14    | -19   | 14    | 3 | y5  |
| ApoE                  | LGPLVEQGR.light       | 484,78 | 489,24 | -19   | y4  | 14    | -19   | 14    | 3 | y4  |
| ApoE                  | LGPLVEQGR.light       | 484,78 | 399,73 | -18,9 | y7  | 14,21 | -18,9 | 14,21 | 3 | y7  |
| ApoE                  | LGPLVEQGR.heavy       | 489,78 | 598,32 | -18,9 | y5  | 14,21 | -18,9 | 14,21 | 3 | y5  |
| ApoE                  | LGPLVEQGR.heavy       | 489,78 | 499,25 | -18,9 | y4  | 14,21 | -18,9 | 14,21 | 3 | y4  |
| ApoE                  | LGPLVEQGR.heavy       | 489,78 | 404,73 | -18,9 | y7  | 14,21 | -18,9 | 14,21 | 3 | y7  |
| ApoE                  | AATVGSLAGQPLQER.light | 499,94 | 244,13 | -17,7 | b3  | 18,31 | -17,7 | 18,31 | 3 | b3  |
| ApoE                  | AATVGSLAGQPLQER.light | 499,94 | 642,36 | -17,7 | y5  | 18,31 | -17,7 | 18,31 | 3 | y5  |
| ApoE                  | AATVGSLAGQPLQER.light | 499,94 | 578,31 | -17,7 | y11 | 18,31 | -17,7 | 18,31 | 3 | y11 |
| ApoE                  | AATVGSLAGQPLQER.heavy | 503,27 | 244,13 | -17,7 | b3  | 18,31 | -17,7 | 18,31 | 3 | b3  |
| ApoE                  | AATVGSLAGQPLQER.heavy | 503,27 | 652,37 | -17,7 | y5  | 18,31 | -17,7 | 18,31 | 3 | y5  |
| ApoE                  | AATVGSLAGQPLQER.heavy | 503,27 | 583,31 | -17,7 | y11 | 18,32 | -17,7 | 18,32 | 3 | y11 |
| ApoM                  | AFLTPR.light          | 409,25 | 599,39 | -15,9 | y5  | 21,44 | -15,9 | 21,44 | 3 | y5  |



|                                 |                            |        |        |       |     |       |       |       |   |     |
|---------------------------------|----------------------------|--------|--------|-------|-----|-------|-------|-------|---|-----|
| ApoM                            | AFLTPR.light               | 409,25 | 486,30 | -15,9 | y4  | 21,44 | -15,9 | 21,44 | 3 | y4  |
| ApoM                            | AFLTPR.light               | 409,25 | 373,22 | -15,9 | y3  | 21,44 | -15,9 | 21,44 | 3 | y3  |
| ApoM                            | AFLTPR.heavy               | 414,25 | 609,40 | -15,9 | y5  | 21,44 | -15,9 | 21,44 | 3 | y5  |
| ApoM                            | AFLTPR.heavy               | 414,25 | 496,31 | -15,9 | y4  | 21,42 | -15,9 | 21,42 | 3 | y4  |
| ApoM                            | AFLTPR.heavy               | 414,25 | 383,23 | -15,9 | y3  | 21,44 | -15,9 | 21,44 | 3 | y3  |
| ApoD                            | VLNQLR.light               | 436,25 | 772,43 | -16,9 | y6  | 9,51  | -16,9 | 9,51  | 3 | y6  |
| ApoD                            | VLNQLR.light               | 436,25 | 659,35 | -16,9 | y5  | 9,51  | -16,9 | 9,51  | 3 | y5  |
| ApoD                            | VLNQLR.light               | 436,25 | 545,30 | -16,9 | y4  | 9,51  | -16,9 | 9,51  | 3 | y4  |
| ApoD                            | VLNQLR.heavy               | 441,26 | 782,44 | -16,9 | y6  | 9,51  | -16,9 | 9,51  | 3 | y6  |
| ApoD                            | VLNQLR.heavy               | 441,26 | 669,36 | -16,9 | y5  | 9,51  | -16,9 | 9,51  | 3 | y5  |
| ApoD                            | VLNQLR.heavy               | 441,26 | 555,31 | -16,9 | y4  | 9,51  | -16,9 | 9,51  | 3 | y4  |
| Beta-2-microglobulin            | IQVYSR.light               | 383,22 | 652,34 | -14,8 | y5  | 8,54  | -14,8 | 8,54  | 3 | y5  |
| Beta-2-microglobulin            | IQVYSR.light               | 383,22 | 524,28 | -14,8 | y4  | 8,54  | -14,8 | 8,54  | 3 | y4  |
| Beta-2-microglobulin            | IQVYSR.light               | 383,22 | 425,21 | -14,8 | y3  | 8,7   | -14,8 | 8,7   | 3 | y3  |
| Beta-2-microglobulin            | IQVYSR.heavy               | 388,22 | 662,35 | -14,8 | y5  | 8,67  | -14,8 | 8,67  | 3 | y5  |
| Beta-2-microglobulin            | IQVYSR.heavy               | 388,22 | 534,29 | -14,8 | y4  | 8,65  | -14,8 | 8,65  | 3 | y4  |
| Beta-2-microglobulin            | IQVYSR.heavy               | 388,22 | 435,22 | -14,8 | y3  | 8,67  | -14,8 | 8,67  | 3 | y3  |
| Beta-2-microglobulin            | VNHVTLSPK.light            | 374,88 | 351,18 | -13   | b3  | 7,95  | -13   | 7,95  | 3 | b3  |
| Beta-2-microglobulin            | VNHVTLSPK.light            | 374,88 | 459,26 | -13   | y4  | 7,95  | -13   | 7,95  | 3 | y4  |
| Beta-2-microglobulin            | VNHVTLSPK.light            | 374,88 | 512,28 | -13   | y9  | 7,95  | -13   | 7,95  | 3 | y9  |
| Beta-2-microglobulin            | VNHVTLSPK.heavy            | 377,55 | 351,18 | -13   | b3  | 7,95  | -13   | 7,95  | 3 | b3  |
| Beta-2-microglobulin            | VNHVTLSPK.heavy            | 377,55 | 467,27 | -13   | y4  | 7,95  | -13   | 7,95  | 3 | y4  |
| Beta-2-microglobulin            | VNHVTLSPK.heavy            | 377,55 | 516,29 | -13   | y9  | 7,95  | -13   | 7,95  | 3 | y9  |
| Beta-Ala-His_dipeptidase        | SVVLIPLGAVDDGEHSQNEK.light | 703,03 | 399,26 | -25,2 | b4  | 28,89 | -25,2 | 28,89 | 3 | b4  |
| Beta-Ala-His_dipeptidase        | SVVLIPLGAVDDGEHSQNEK.light | 703,03 | 512,34 | -25,2 | b5  | 28,91 | -25,2 | 28,91 | 3 | b5  |
| Beta-Ala-His_dipeptidase        | SVVLIPLGAVDDGEHSQNEK.light | 703,03 | 798,37 | -25,2 | y15 | 28,89 | -25,2 | 28,89 | 3 | y15 |
| Beta-Ala-His_dipeptidase        | SVVLIPLGAVDDGEHSQNEK.heavy | 705,70 | 399,26 | -25,2 | b4  | 28,88 | -25,2 | 28,88 | 3 | b4  |
| Beta-Ala-His_dipeptidase        | SVVLIPLGAVDDGEHSQNEK.heavy | 705,70 | 512,34 | -25,2 | b5  | 28,79 | -25,2 | 28,79 | 3 | b5  |
| Beta-Ala-His_dipeptidase        | SVVLIPLGAVDDGEHSQNEK.heavy | 705,70 | 802,38 | -25,2 | y15 | 28,89 | -25,2 | 28,89 | 3 | y15 |
| C4b-binding_protein_alpha_chain | EDVYVGTVLR.light           | 625,34 | 344,15 | -24,5 | b3  | 25,56 | -24,5 | 25,56 | 3 | b3  |
| C4b-binding_protein_alpha_chain | EDVYVGTVLR.light           | 625,34 | 644,41 | -24,5 | y6  | 25,56 | -24,5 | 25,56 | 3 | y6  |
| C4b-binding_protein_alpha_chain | EDVYVGTVLR.light           | 625,34 | 545,34 | -24,5 | y5  | 25,56 | -24,5 | 25,56 | 3 | y5  |

|                                 |                   |        |        |       |    |       |       |       |   |    |
|---------------------------------|-------------------|--------|--------|-------|----|-------|-------|-------|---|----|
| C4b-binding_protein_alpha_chain | EDVYVVGTVLR.heavy | 630,35 | 344,15 | -24,5 | b3 | 25,61 | -24,5 | 25,61 | 3 | b3 |
| C4b-binding_protein_alpha_chain | EDVYVVGTVLR.heavy | 630,35 | 654,42 | -24,5 | y6 | 25,56 | -24,5 | 25,56 | 3 | y6 |
| C4b-binding_protein_alpha_chain | EDVYVVGTVLR.heavy | 630,35 | 555,35 | -24,5 | y5 | 25,57 | -24,5 | 25,57 | 3 | y5 |
| C4b-binding_protein_alpha_chain | LNNGEITQHR.light  | 394,54 | 541,28 | -13,8 | y4 | 5,14  | -13,8 | 5,14  | 3 | y4 |
| C4b-binding_protein_alpha_chain | LNNGEITQHR.light  | 394,54 | 534,76 | -13,8 | y9 | 5,14  | -13,8 | 5,14  | 3 | y9 |
| C4b-binding_protein_alpha_chain | LNNGEITQHR.light  | 394,54 | 477,74 | -13,8 | y8 | 5,14  | -13,8 | 5,14  | 3 | y8 |
| C4b-binding_protein_alpha_chain | LNNGEITQHR.heavy  | 397,87 | 551,29 | -13,8 | y4 | 5,14  | -13,8 | 5,14  | 3 | y4 |
| C4b-binding_protein_alpha_chain | LNNGEITQHR.heavy  | 397,87 | 539,77 | -13,8 | y9 | 5,14  | -13,8 | 5,14  | 3 | y9 |
| C4b-binding_protein_alpha_chain | LNNGEITQHR.heavy  | 397,87 | 482,75 | -13,8 | y8 | 5,14  | -13,8 | 5,14  | 3 | y8 |
| CD5_antigen-like                | LVGGLHR.light     | 376,23 | 213,16 | -14,5 | b2 | 7,06  | -14,5 | 7,06  | 3 | b2 |
| CD5_antigen-like                | LVGGLHR.light     | 376,23 | 638,37 | -14,5 | y6 | 7,06  | -14,5 | 7,06  | 3 | y6 |
| CD5_antigen-like                | LVGGLHR.light     | 376,23 | 539,30 | -14,5 | y5 | 7,06  | -14,5 | 7,06  | 3 | y5 |
| CD5_antigen-like                | LVGGLHR.heavy     | 381,24 | 213,16 | -14,5 | b2 | 7,06  | -14,5 | 7,06  | 3 | b2 |
| CD5_antigen-like                | LVGGLHR.heavy     | 381,24 | 648,38 | -14,5 | y6 | 7,06  | -14,5 | 7,06  | 3 | y6 |
| CD5_antigen-like                | LVGGLHR.heavy     | 381,24 | 549,31 | -14,5 | y5 | 7,06  | -14,5 | 7,06  | 3 | y5 |
| CRP                             | AFVFPK.light      | 354,71 | 637,37 | -13,7 | y5 | 19,59 | -13,7 | 19,59 | 3 | y5 |
| CRP                             | AFVFPK.light      | 354,71 | 490,30 | -13,7 | y4 | 19,62 | -13,7 | 19,62 | 3 | y4 |
| CRP                             | AFVFPK.light      | 354,71 | 391,23 | -13,7 | y3 | 19,62 | -13,7 | 19,62 | 3 | y3 |
| CRP                             | AFVFPK.heavy      | 358,71 | 645,39 | -13,7 | y5 | 19,6  | -13,7 | 19,6  | 3 | y5 |
| CRP                             | AFVFPK.heavy      | 358,71 | 498,32 | -13,7 | y4 | 19,6  | -13,7 | 19,6  | 3 | y4 |
| CRP                             | AFVFPK.heavy      | 358,71 | 399,25 | -13,7 | y3 | 19,62 | -13,7 | 19,62 | 3 | y3 |
| CRP                             | ESDTSYVSLK.light  | 564,77 | 696,39 | -22,1 | y6 | 13,89 | -22,1 | 13,89 | 3 | y6 |
| CRP                             | ESDTSYVSLK.light  | 564,77 | 609,36 | -22,1 | y5 | 13,87 | -22,1 | 13,87 | 3 | y5 |
| CRP                             | ESDTSYVSLK.light  | 564,77 | 446,30 | -22,1 | y4 | 13,88 | -22,1 | 13,88 | 3 | y4 |
| CRP                             | ESDTSYVSLK.light  | 564,77 | 347,23 | -22,1 | y3 | 13,88 | -22,1 | 13,88 | 3 | y3 |
| CRP                             | ESDTSYVSLK.heavy  | 567,78 | 702,41 | -22,1 | y6 | 13,91 | -22,1 | 13,91 | 3 | y6 |
| CRP                             | ESDTSYVSLK.heavy  | 567,78 | 615,38 | -22,1 | y5 | 13,91 | -22,1 | 13,91 | 3 | y5 |
| CRP                             | ESDTSYVSLK.heavy  | 567,78 | 452,32 | -22,1 | y4 | 13,89 | -22,1 | 13,89 | 3 | y4 |
| CRP                             | ESDTSYVSLK.heavy  | 567,78 | 353,25 | -22,1 | y3 | 13,91 | -22,1 | 13,91 | 3 | y3 |
| AAG                             | TEDTIFLR.light    | 497,76 | 764,43 | -19,4 | y6 | 20,18 | -19,4 | 20,18 | 3 | y6 |
| AAG                             | TEDTIFLR.light    | 497,76 | 548,36 | -19,4 | y4 | 20,18 | -19,4 | 20,18 | 3 | y4 |
| AAG                             | TEDTIFLR.light    | 497,76 | 435,27 | -19,4 | y3 | 20,18 | -19,4 | 20,18 | 3 | y3 |

|                |                               |        |        |       |    |       |       |       |   |    |
|----------------|-------------------------------|--------|--------|-------|----|-------|-------|-------|---|----|
| AAG            | TEDTIFLR.heavy                | 500,77 | 770,45 | -19,4 | y6 | 20,17 | -19,4 | 20,17 | 3 | y6 |
| AAG            | TEDTIFLR.heavy                | 500,77 | 554,38 | -19,4 | y4 | 20,18 | -19,4 | 20,18 | 3 | y4 |
| AAG            | TEDTIFLR.heavy                | 500,77 | 441,29 | -19,4 | y3 | 20,18 | -19,4 | 20,18 | 3 | y3 |
| AAG            | WFYIASAFR.light               | 580,80 | 664,38 | -18   | y6 | 35,76 | -18   | 35,76 | 3 | y6 |
| AAG            | WFYIASAFR.light               | 580,80 | 551,29 | -18   | y5 | 35,76 | -18   | 35,76 | 3 | y5 |
| AAG            | WFYIASAFR.light               | 580,80 | 480,26 | -18   | y4 | 35,76 | -18   | 35,76 | 3 | y4 |
| AAG            | WFYIASAFR.light               | 580,80 | 305,65 | -18   | b4 | 35,75 | -18   | 35,75 | 3 | b4 |
| AAG            | WFYIASAFR.heavy               | 585,80 | 674,39 | -18   | y6 | 35,75 | -18   | 35,75 | 3 | y6 |
| AAG            | WFYIASAFR.heavy               | 585,80 | 561,30 | -18   | y5 | 35,75 | -18   | 35,75 | 3 | y5 |
| AAG            | WFYIASAFR.heavy               | 585,80 | 490,26 | -18   | y4 | 35,75 | -18   | 35,75 | 3 | y4 |
| AAG            | WFYIASAFR.heavy               | 585,80 | 305,65 | -18   | b4 | 35,75 | -18   | 35,75 | 3 | b4 |
| Prealbumin     | AADDTWEPFASGK.light           | 697,81 | 606,32 | -27,4 | y6 | 21,64 | -27,4 | 21,64 | 3 | y6 |
| Prealbumin     | AADDTWEPFASGK.light           | 697,81 | 291,17 | -27,4 | y3 | 21,62 | -27,4 | 21,62 | 3 | y3 |
| Prealbumin     | AADDTWEPFASGK.light           | 697,81 | 474,18 | -27,4 | b5 | 21,62 | -27,4 | 21,62 | 3 | b5 |
| Prealbumin     | AADDTWEPFASGK.heavy           | 701,82 | 614,34 | -27,4 | y6 | 21,62 | -27,4 | 21,62 | 3 | y6 |
| Prealbumin     | AADDTWEPFASGK.heavy           | 701,82 | 299,18 | -27,4 | y3 | 21,62 | -27,4 | 21,62 | 3 | y3 |
| Prealbumin     | AADDTWEPFASGK.heavy           | 701,82 | 474,18 | -27,4 | b5 | 21,6  | -27,4 | 21,6  | 3 | b5 |
| Prealbumin     | ALGISPFHEHAEEVFTANDSGPR.light | 613,56 | 645,30 | -21,9 | y6 | 25,59 | -21,9 | 25,59 | 3 | y6 |
| Prealbumin     | ALGISPFHEHAEEVFTANDSGPR.light | 613,56 | 531,25 | -21,9 | y5 | 25,58 | -21,9 | 25,58 | 3 | y5 |
| Prealbumin     | ALGISPFHEHAEEVFTANDSGPR.light | 613,56 | 323,15 | -21,9 | y6 | 25,6  | -21,9 | 25,6  | 3 | y6 |
| Prealbumin     | ALGISPFHEHAEEVFTANDSGPR.heavy | 615,06 | 645,30 | -21,9 | y6 | 25,6  | -21,9 | 25,6  | 3 | y6 |
| Prealbumin     | ALGISPFHEHAEEVFTANDSGPR.heavy | 615,06 | 531,25 | -21,9 | y5 | 25,59 | -21,9 | 25,59 | 3 | y5 |
| Prealbumin     | ALGISPFHEHAEEVFTANDSGPR.heavy | 615,06 | 323,15 | -21,9 | y6 | 25,6  | -21,9 | 25,6  | 3 | y6 |
| Albumin        | LVNEVTEFAK.light              | 575,31 | 694,38 | -22,5 | y6 | 19,49 | -22,5 | 19,49 | 3 | y6 |
| Albumin        | LVNEVTEFAK.light              | 575,31 | 595,31 | -22,5 | y5 | 19,42 | -22,5 | 19,42 | 3 | y5 |
| Albumin        | LVNEVTEFAK.light              | 575,31 | 469,23 | -22,5 | y8 | 19,46 | -22,5 | 19,46 | 3 | y8 |
| Albumin        | LVNEVTEFAK.heavy              | 578,32 | 694,38 | -22,5 | y6 | 19,29 | -22,5 | 19,29 | 3 | y6 |
| Albumin        | LVNEVTEFAK.heavy              | 578,32 | 595,31 | -22,5 | y5 | 19,3  | -22,5 | 19,3  | 3 | y5 |
| Albumin        | LVNEVTEFAK.heavy              | 578,32 | 469,23 | -22,5 | y8 | 19,44 | -22,5 | 19,44 | 3 | y8 |
| Cholinesterase | YTLNTESTR.light               | 599,31 | 277,15 | -23,5 | b2 | 15,46 | -23,5 | 15,46 | 3 | b2 |
| Cholinesterase | YTLNTESTR.light               | 599,31 | 921,46 | -23,5 | y8 | 15,46 | -23,5 | 15,46 | 3 | y8 |
| Cholinesterase | YTLNTESTR.light               | 599,31 | 707,33 | -23,5 | y6 | 15,46 | -23,5 | 15,46 | 3 | y6 |

|                                       |                   |        |        |       |    |       |       |       |   |    |
|---------------------------------------|-------------------|--------|--------|-------|----|-------|-------|-------|---|----|
| Cholinesterase                        | YLTNTESTR.heavy   | 604,31 | 277,15 | -23,5 | b2 | 15,44 | -23,5 | 15,44 | 3 | b2 |
| Cholinesterase                        | YLTNTESTR.heavy   | 604,31 | 931,47 | -23,5 | y8 | 15,46 | -23,5 | 15,46 | 3 | y8 |
| Cholinesterase                        | YLTNTESTR.heavy   | 604,31 | 717,34 | -23,5 | y6 | 15,44 | -23,5 | 15,44 | 3 | y6 |
| Clusterin                             | ELDESLQVAER.light | 644,82 | 802,44 | -25,3 | y7 | 16,71 | -25,3 | 16,71 | 3 | y7 |
| Clusterin                             | ELDESLQVAER.light | 644,82 | 602,33 | -25,3 | y5 | 16,71 | -25,3 | 16,71 | 3 | y5 |
| Clusterin                             | ELDESLQVAER.light | 644,82 | 474,27 | -25,3 | y4 | 16,71 | -25,3 | 16,71 | 3 | y4 |
| Clusterin                             | ELDESLQVAER.light | 644,82 | 375,20 | -25,3 | y3 | 16,71 | -25,3 | 16,71 | 3 | y3 |
| Clusterin                             | ELDESLQVAER.heavy | 649,83 | 812,45 | -25,3 | y7 | 16,71 | -25,3 | 16,71 | 3 | y7 |
| Clusterin                             | ELDESLQVAER.heavy | 649,83 | 612,33 | -25,3 | y5 | 16,7  | -25,3 | 16,7  | 3 | y5 |
| Clusterin                             | ELDESLQVAER.heavy | 649,83 | 484,28 | -25,3 | y4 | 16,7  | -25,3 | 16,7  | 3 | y4 |
| Clusterin                             | ELDESLQVAER.heavy | 649,83 | 385,21 | -25,3 | y3 | 16,71 | -25,3 | 16,71 | 3 | y3 |
| Clusterin                             | TLLSNLEEAK.light  | 559,31 | 215,14 | -21,9 | b2 | 22,15 | -21,9 | 22,15 | 3 | b2 |
| Clusterin                             | TLLSNLEEAK.light  | 559,31 | 903,48 | -21,9 | y8 | 22,15 | -21,9 | 22,15 | 3 | y8 |
| Clusterin                             | TLLSNLEEAK.light  | 559,31 | 790,39 | -21,9 | y7 | 22,15 | -21,9 | 22,15 | 3 | y7 |
| Clusterin                             | TLLSNLEEAK.heavy  | 563,32 | 215,14 | -21,9 | b2 | 22,15 | -21,9 | 22,15 | 3 | b2 |
| Clusterin                             | TLLSNLEEAK.heavy  | 563,32 | 911,49 | -21,9 | y8 | 22,15 | -21,9 | 22,15 | 3 | y8 |
| Clusterin                             | TLLSNLEEAK.heavy  | 563,32 | 798,41 | -21,9 | y7 | 22,15 | -21,9 | 22,15 | 3 | y7 |
| Coagulation_factor_X                  | TGIVSGFGR.light   | 447,25 | 272,16 | -17,4 | b3 | 16,58 | -17,4 | 16,58 | 3 | b3 |
| Coagulation_factor_X                  | TGIVSGFGR.light   | 447,25 | 622,33 | -17,4 | y6 | 16,58 | -17,4 | 16,58 | 3 | y6 |
| Coagulation_factor_X                  | TGIVSGFGR.light   | 447,25 | 523,26 | -17,4 | y5 | 16,57 | -17,4 | 16,57 | 3 | y5 |
| Coagulation_factor_X                  | TGIVSGFGR.heavy   | 452,25 | 272,16 | -17,4 | b3 | 16,57 | -17,4 | 16,57 | 3 | b3 |
| Coagulation_factor_X                  | TGIVSGFGR.heavy   | 452,25 | 632,34 | -17,4 | y6 | 16,58 | -17,4 | 16,58 | 3 | y6 |
| Coagulation_factor_X                  | TGIVSGFGR.heavy   | 452,25 | 533,27 | -17,4 | y5 | 16,57 | -17,4 | 16,57 | 3 | y5 |
| Complement_C1q_subcomponent_subunit_B | IAFSATR.light     | 383,22 | 652,34 | -14,8 | y6 | #N/A  | -14,8 | #N/A  | 3 | y6 |
| Complement_C1q_subcomponent_subunit_B | IAFSATR.light     | 383,22 | 581,30 | -14,8 | y5 | #N/A  | -14,8 | #N/A  | 3 | y5 |
| Complement_C1q_subcomponent_subunit_B | IAFSATR.light     | 383,22 | 434,24 | -14,8 | y4 | #N/A  | -14,8 | #N/A  | 3 | y4 |
| Complement_C1q_subcomponent_subunit_B | IAFSATR.heavy     | 388,22 | 662,35 | -14,8 | y6 | 8,67  | -14,8 | 8,67  | 3 | y6 |
| Complement_C1q_subcomponent_subunit_B | IAFSATR.heavy     | 388,22 | 591,31 | -14,8 | y5 | 8,54  | -14,8 | 8,54  | 3 | y5 |
| Complement_C1q_subcomponent_subunit_B | IAFSATR.heavy     | 388,22 | 444,24 | -14,8 | y4 | 8,54  | -14,8 | 8,54  | 3 | y4 |
| Complement_C1q_subcomponent_subunit_C | FQSVFTVTR.light   | 542,79 | 809,45 | -21,2 | y7 | 21,79 | -21,2 | 21,79 | 3 | y7 |
| Complement_C1q_subcomponent_subunit_C | FQSVFTVTR.light   | 542,79 | 623,35 | -21,2 | y5 | 21,79 | -21,2 | 21,79 | 3 | y5 |
| Complement_C1q_subcomponent_subunit_C | FQSVFTVTR.light   | 542,79 | 476,28 | -21,2 | y4 | 21,79 | -21,2 | 21,79 | 3 | y4 |

|                                       |                   |        |        |       |    |       |       |       |   |    |
|---------------------------------------|-------------------|--------|--------|-------|----|-------|-------|-------|---|----|
| Complement_C1q_subcomponent_subunit_C | FQSVFTVTR.heavy   | 547,80 | 819,46 | -21,2 | y7 | 21,79 | -21,2 | 21,79 | 3 | y7 |
| Complement_C1q_subcomponent_subunit_C | FQSVFTVTR.heavy   | 547,80 | 633,36 | -21,2 | y5 | 21,79 | -21,2 | 21,79 | 3 | y5 |
| Complement_C1q_subcomponent_subunit_C | FQSVFTVTR.heavy   | 547,80 | 486,29 | -21,2 | y4 | 21,81 | -21,2 | 21,81 | 3 | y4 |
| Complement_C1r_subcomponent           | TNFDNDIALVR.light | 639,33 | 571,39 | -25,1 | y5 | 22,85 | -25,1 | 22,85 | 3 | y5 |
| Complement_C1r_subcomponent           | TNFDNDIALVR.light | 639,33 | 458,31 | -25,1 | y4 | 22,85 | -25,1 | 22,85 | 3 | y4 |
| Complement_C1r_subcomponent           | TNFDNDIALVR.light | 639,33 | 387,27 | -25,1 | y3 | 22,85 | -25,1 | 22,85 | 3 | y3 |
| Complement_C1r_subcomponent           | TNFDNDIALVR.heavy | 644,33 | 581,40 | -25,1 | y5 | 22,85 | -25,1 | 22,85 | 3 | y5 |
| Complement_C1r_subcomponent           | TNFDNDIALVR.heavy | 644,33 | 468,32 | -25,1 | y4 | 22,85 | -25,1 | 22,85 | 3 | y4 |
| Complement_C1r_subcomponent           | TNFDNDIALVR.heavy | 644,33 | 397,28 | -25,1 | y3 | 22,85 | -25,1 | 22,85 | 3 | y3 |
| Complement_C1r_subcomponent           | YTTEIIK.light     | 434,24 | 704,42 | -16,9 | y6 | 13,17 | -16,9 | 13,17 | 3 | y6 |
| Complement_C1r_subcomponent           | YTTEIIK.light     | 434,24 | 603,37 | -16,9 | y5 | 13,17 | -16,9 | 13,17 | 3 | y5 |
| Complement_C1r_subcomponent           | YTTEIIK.light     | 434,24 | 373,28 | -16,9 | y3 | 13,17 | -16,9 | 13,17 | 3 | y3 |
| Complement_C1r_subcomponent           | YTTEIIK.heavy     | 437,25 | 710,44 | -16,9 | y6 | 13,18 | -16,9 | 13,18 | 3 | y6 |
| Complement_C1r_subcomponent           | YTTEIIK.heavy     | 437,25 | 609,39 | -16,9 | y5 | 13,17 | -16,9 | 13,17 | 3 | y5 |
| Complement_C1r_subcomponent           | YTTEIIK.heavy     | 437,25 | 379,30 | -16,9 | y3 | 13,18 | -16,9 | 13,18 | 3 | y3 |
| Complement_C2                         | HAFILQDTK.light   | 358,20 | 356,17 | -12,4 | b3 | 14,16 | -12,4 | 14,16 | 3 | b3 |
| Complement_C2                         | HAFILQDTK.light   | 358,20 | 469,26 | -12,4 | b4 | 14,16 | -12,4 | 14,16 | 3 | b4 |
| Complement_C2                         | HAFILQDTK.light   | 358,20 | 491,25 | -12,4 | y4 | 14,16 | -12,4 | 14,16 | 3 | y4 |
| Complement_C2                         | HAFILQDTK.heavy   | 360,87 | 356,17 | -12,4 | b3 | 14,16 | -12,4 | 14,16 | 3 | b3 |
| Complement_C2                         | HAFILQDTK.heavy   | 360,87 | 469,26 | -12,4 | b4 | 14,16 | -12,4 | 14,16 | 3 | b4 |
| Complement_C2                         | HAFILQDTK.heavy   | 360,87 | 499,26 | -12,4 | y4 | 14,16 | -12,4 | 14,16 | 3 | y4 |
| Complement_C2                         | TAVDHIR.light     | 406,22 | 639,36 | -15,7 | y5 | 4,96  | -15,7 | 4,96  | 3 | y5 |
| Complement_C2                         | TAVDHIR.light     | 406,22 | 540,29 | -15,7 | y4 | 4,96  | -15,7 | 4,96  | 3 | y4 |
| Complement_C2                         | TAVDHIR.light     | 406,22 | 425,26 | -15,7 | y3 | 4,96  | -15,7 | 4,96  | 3 | y3 |
| Complement_C2                         | TAVDHIR.heavy     | 411,23 | 649,37 | -15,7 | y5 | 4,96  | -15,7 | 4,96  | 3 | y5 |
| Complement_C2                         | TAVDHIR.heavy     | 411,23 | 550,30 | -15,7 | y4 | 4,96  | -15,7 | 4,96  | 3 | y4 |
| Complement_C2                         | TAVDHIR.heavy     | 411,23 | 435,27 | -15,7 | y3 | 4,96  | -15,7 | 4,96  | 3 | y3 |
| Complement_C3                         | TGLQEVEVK.light   | 501,78 | 731,39 | -19,6 | y6 | 13,69 | -19,6 | 13,69 | 3 | y6 |
| Complement_C3                         | TGLQEVEVK.light   | 501,78 | 603,33 | -19,6 | y5 | 13,69 | -19,6 | 13,69 | 3 | y5 |
| Complement_C3                         | TGLQEVEVK.light   | 501,78 | 422,74 | -19,6 | y7 | 13,69 | -19,6 | 13,69 | 3 | y7 |
| Complement_C3                         | TGLQEVEVK.heavy   | 505,78 | 739,41 | -19,6 | y6 | 13,69 | -19,6 | 13,69 | 3 | y6 |
| Complement_C3                         | TGLQEVEVK.heavy   | 505,78 | 611,35 | -19,6 | y5 | 13,69 | -19,6 | 13,69 | 3 | y5 |

|                        |                       |        |        |       |     |       |       |       |   |     |
|------------------------|-----------------------|--------|--------|-------|-----|-------|-------|-------|---|-----|
| Complement_C3          | TGLQEVEVK.heavy       | 505,78 | 426,75 | -19,6 | y7  | 13,68 | -19,6 | 13,68 | 3 | y7  |
| Complement_C3          | SGIPIVTSYQIHFTK.light | 596,66 | 765,92 | -21,2 | y13 | 31,05 | -21,2 | 31,05 | 3 | y13 |
| Complement_C3          | SGIPIVTSYQIHFTK.light | 596,66 | 510,95 | -21,2 | y13 | 31,06 | -21,2 | 31,06 | 3 | y13 |
| Complement_C3          | SGIPIVTSYQIHFTK.light | 596,66 | 258,14 | -21,2 | b3  | 31,06 | -21,2 | 31,06 | 3 | b3  |
| Complement_C3          | SGIPIVTSYQIHFTK.heavy | 599,33 | 769,93 | -21,2 | y13 | 31,05 | -21,2 | 31,05 | 3 | y13 |
| Complement_C3          | SGIPIVTSYQIHFTK.heavy | 599,33 | 513,62 | -21,2 | y13 | 31,05 | -21,2 | 31,05 | 3 | y13 |
| Complement_C3          | SGIPIVTSYQIHFTK.heavy | 599,33 | 258,14 | -21,2 | b3  | 31,05 | -21,2 | 31,05 | 3 | b3  |
| Complement_C4-B        | GSFEFPVGDAVSK.light   | 670,33 | 568,24 | -26,3 | b5  | 25,33 | -26,3 | 25,33 | 3 | b5  |
| Complement_C4-B        | GSFEFPVGDAVSK.light   | 670,33 | 919,49 | -26,3 | y9  | 25,33 | -26,3 | 25,33 | 3 | y9  |
| Complement_C4-B        | GSFEFPVGDAVSK.light   | 670,33 | 772,42 | -26,3 | y8  | 25,32 | -26,3 | 25,32 | 3 | y8  |
| Complement_C4-B        | GSFEFPVGDAVSK.heavy   | 674,34 | 568,24 | -26,3 | b5  | 25,33 | -26,3 | 25,33 | 3 | b5  |
| Complement_C4-B        | GSFEFPVGDAVSK.heavy   | 674,34 | 927,50 | -26,3 | y9  | 25,32 | -26,3 | 25,32 | 3 | y9  |
| Complement_C4-B        | GSFEFPVGDAVSK.heavy   | 674,34 | 780,43 | -26,3 | y8  | 25,3  | -26,3 | 25,3  | 3 | y8  |
| Complement_C4-B        | VGDTLNLNLR.light      | 557,81 | 272,12 | -21,8 | b3  | 21,6  | -21,8 | 21,6  | 3 | b3  |
| Complement_C4-B        | VGDTLNLNLR.light      | 557,81 | 629,37 | -21,8 | y5  | 21,6  | -21,8 | 21,6  | 3 | y5  |
| Complement_C4-B        | VGDTLNLNLR.light      | 557,81 | 402,25 | -21,8 | y3  | 21,6  | -21,8 | 21,6  | 3 | y3  |
| Complement_C4-B        | VGDTLNLNLR.heavy      | 562,82 | 272,12 | -21,8 | b3  | 21,6  | -21,8 | 21,6  | 3 | b3  |
| Complement_C4-B        | VGDTLNLNLR.heavy      | 562,82 | 639,38 | -21,8 | y5  | 21,6  | -21,8 | 21,6  | 3 | y5  |
| Complement_C4-B        | VGDTLNLNLR.heavy      | 562,82 | 412,25 | -21,8 | y3  | 21,6  | -21,8 | 21,6  | 3 | y3  |
| Coagulation_factor_XII | VVGGLVALR.light       | 442,29 | 784,50 | -17,2 | y8  | 20,82 | -17,2 | 20,82 | 3 | y8  |
| Coagulation_factor_XII | VVGGLVALR.light       | 442,29 | 685,44 | -17,2 | y7  | 20,81 | -17,2 | 20,81 | 3 | y7  |
| Coagulation_factor_XII | VVGGLVALR.light       | 442,29 | 458,31 | -17,2 | y4  | 20,81 | -17,2 | 20,81 | 3 | y4  |
| Coagulation_factor_XII | VVGGLVALR.heavy       | 447,29 | 794,51 | -17,2 | y8  | 20,81 | -17,2 | 20,81 | 3 | y8  |
| Coagulation_factor_XII | VVGGLVALR.heavy       | 447,29 | 695,44 | -17,2 | y7  | 20,81 | -17,2 | 20,81 | 3 | y7  |
| Coagulation_factor_XII | VVGGLVALR.heavy       | 447,29 | 468,32 | -17,2 | y4  | 20,81 | -17,2 | 20,81 | 3 | y4  |
| Coagulation_factor_XII | TEQAAVAR.light        | 423,23 | 231,10 | -16,4 | b2  | 3,38  | -16,4 | 3,38  | 3 | b2  |
| Coagulation_factor_XII | TEQAAVAR.light        | 423,23 | 615,36 | -16,4 | y6  | 3,38  | -16,4 | 3,38  | 3 | y6  |
| Coagulation_factor_XII | TEQAAVAR.light        | 423,23 | 487,30 | -16,4 | y5  | 3,38  | -16,4 | 3,38  | 3 | y5  |
| Coagulation_factor_XII | TEQAAVAR.heavy        | 428,23 | 231,10 | -16,4 | b2  | 3,38  | -16,4 | 3,38  | 3 | b2  |
| Coagulation_factor_XII | TEQAAVAR.heavy        | 428,23 | 625,37 | -16,4 | y6  | 3,38  | -16,4 | 3,38  | 3 | y6  |
| Coagulation_factor_XII | TEQAAVAR.heavy        | 428,23 | 497,31 | -16,4 | y5  | 3,38  | -16,4 | 3,38  | 3 | y5  |
| Complement_C5          | VFQFLEK.light         | 455,76 | 811,43 | -17,7 | y6  | 23,54 | -17,7 | 23,54 | 3 | y6  |

|                                    |                     |        |        |       |    |       |       |       |   |    |
|------------------------------------|---------------------|--------|--------|-------|----|-------|-------|-------|---|----|
| Complement_C5                      | VFQFLEK.light       | 455,76 | 664,37 | -17,7 | y5 | 23,54 | -17,7 | 23,54 | 3 | y5 |
| Complement_C5                      | VFQFLEK.light       | 455,76 | 247,14 | -17,7 | b2 | 23,54 | -17,7 | 23,54 | 3 | b2 |
| Complement_C5                      | VFQFLEK.heavy       | 459,76 | 819,45 | -17,7 | y6 | 23,54 | -17,7 | 23,54 | 3 | y6 |
| Complement_C5                      | VFQFLEK.heavy       | 459,76 | 672,38 | -17,7 | y5 | 23,52 | -17,7 | 23,52 | 3 | y5 |
| Complement_C5                      | VFQFLEK.heavy       | 459,76 | 247,14 | -17,7 | b2 | 23,52 | -17,7 | 23,52 | 3 | b2 |
| Complement_component_C8_beta_chain | SDLEVAHYK.light     | 354,51 | 203,07 | -12,3 | b2 | 10,21 | -12,3 | 10,21 | 3 | b2 |
| Complement_component_C8_beta_chain | SDLEVAHYK.light     | 354,51 | 487,75 | -12,3 | y8 | 10,21 | -12,3 | 10,21 | 3 | y8 |
| Complement_component_C8_beta_chain | SDLEVAHYK.light     | 354,51 | 430,24 | -12,3 | y7 | 10,2  | -12,3 | 10,2  | 3 | y7 |
| Complement_component_C8_beta_chain | SDLEVAHYK.heavy     | 357,18 | 203,07 | -12,3 | b2 | 10,2  | -12,3 | 10,2  | 3 | b2 |
| Complement_component_C8_beta_chain | SDLEVAHYK.heavy     | 357,18 | 491,76 | -12,3 | y8 | 10,2  | -12,3 | 10,2  | 3 | y8 |
| Complement_component_C8_beta_chain | SDLEVAHYK.heavy     | 357,18 | 434,24 | -12,3 | y7 | 10,2  | -12,3 | 10,2  | 3 | y7 |
| Complement_component_C9            | LSPIYNLVPVK.light   | 621,88 | 442,30 | -24,4 | y4 | 34,26 | -24,4 | 34,26 | 3 | y4 |
| Complement_component_C9            | LSPIYNLVPVK.light   | 621,88 | 343,23 | -24,4 | y3 | 34,28 | -24,4 | 34,28 | 3 | y3 |
| Complement_component_C9            | LSPIYNLVPVK.light   | 621,88 | 521,82 | -24,4 | y9 | 34,23 | -24,4 | 34,23 | 3 | y9 |
| Complement_component_C9            | LSPIYNLVPVK.heavy   | 625,88 | 450,32 | -24,4 | y4 | 34,4  | -24,4 | 34,4  | 3 | y4 |
| Complement_component_C9            | LSPIYNLVPVK.heavy   | 625,88 | 351,25 | -24,4 | y3 | 34,38 | -24,4 | 34,38 | 3 | y3 |
| Complement_component_C9            | LSPIYNLVPVK.heavy   | 625,88 | 525,83 | -24,4 | y9 | 34,4  | -24,4 | 34,4  | 3 | y9 |
| Complement_component_C9            | VVEESELAR.light     | 516,27 | 328,19 | -20,1 | b3 | 9,73  | -20,1 | 9,73  | 3 | b3 |
| Complement_component_C9            | VVEESELAR.light     | 516,27 | 833,40 | -20,1 | y7 | 9,73  | -20,1 | 9,73  | 3 | y7 |
| Complement_component_C9            | VVEESELAR.light     | 516,27 | 575,31 | -20,1 | y5 | 9,63  | -20,1 | 9,63  | 3 | y5 |
| Complement_component_C9            | VVEESELAR.heavy     | 521,28 | 328,19 | -20,1 | b3 | 9,73  | -20,1 | 9,73  | 3 | b3 |
| Complement_component_C9            | VVEESELAR.heavy     | 521,28 | 843,41 | -20,1 | y7 | 9,73  | -20,1 | 9,73  | 3 | y7 |
| Complement_component_C9            | VVEESELAR.heavy     | 521,28 | 585,32 | -20,1 | y5 | 9,73  | -20,1 | 9,73  | 3 | y5 |
| Complement_factor_D                | THHDGAITER.light    | 379,52 | 239,11 | -13,2 | b2 | 2,33  | -13,2 | 2,33  | 3 | b2 |
| Complement_factor_D                | THHDGAITER.light    | 379,52 | 619,26 | -13,2 | b6 | 2,33  | -13,2 | 2,33  | 3 | b6 |
| Complement_factor_D                | THHDGAITER.light    | 379,52 | 405,21 | -13,2 | y3 | 2,33  | -13,2 | 2,33  | 3 | y3 |
| Complement_factor_D                | THHDGAITER.heavy    | 382,86 | 239,11 | -13,2 | b2 | 2,33  | -13,2 | 2,33  | 3 | b2 |
| Complement_factor_D                | THHDGAITER.heavy    | 382,86 | 619,26 | -13,2 | b6 | 2,33  | -13,2 | 2,33  | 3 | b6 |
| Complement_factor_D                | THHDGAITER.heavy    | 382,86 | 415,22 | -13,2 | y3 | 2,33  | -13,2 | 2,33  | 3 | y3 |
| Complement_factor_I                | HGNTDSEGIVEVK.light | 462,23 | 525,21 | -16,3 | b5 | 10,31 | -16,3 | 10,31 | 3 | b5 |
| Complement_factor_I                | HGNTDSEGIVEVK.light | 462,23 | 644,40 | -16,3 | y6 | 10,32 | -16,3 | 10,32 | 3 | y6 |
| Complement_factor_I                | HGNTDSEGIVEVK.light | 462,23 | 474,29 | -16,3 | y4 | 10,31 | -16,3 | 10,31 | 3 | y4 |

|                                 |                       |        |        |       |    |       |       |       |   |    |
|---------------------------------|-----------------------|--------|--------|-------|----|-------|-------|-------|---|----|
| Complement_factor_I             | HGNTDSEGIVEVK.heavy   | 464,23 | 525,21 | -16,3 | b5 | 10,31 | -16,3 | 10,31 | 3 | b5 |
| Complement_factor_I             | HGNTDSEGIVEVK.heavy   | 464,23 | 650,42 | -16,3 | y6 | 10,32 | -16,3 | 10,32 | 3 | y6 |
| Complement_factor_I             | HGNTDSEGIVEVK.heavy   | 464,23 | 480,31 | -16,3 | y4 | 10,31 | -16,3 | 10,31 | 3 | y4 |
| Complement_factor_I             | TSSSFEVR.light        | 456,72 | 724,36 | -17,8 | y6 | 8,7   | -17,8 | 8,7   | 3 | y6 |
| Complement_factor_I             | TSSSFEVR.light        | 456,72 | 637,33 | -17,8 | y5 | 8,72  | -17,8 | 8,72  | 3 | y5 |
| Complement_factor_I             | TSSSFEVR.light        | 456,72 | 550,30 | -17,8 | y4 | 8,72  | -17,8 | 8,72  | 3 | y4 |
| Complement_factor_I             | TSSSFEVR.heavy        | 461,73 | 734,37 | -17,8 | y6 | 8,7   | -17,8 | 8,7   | 3 | y6 |
| Complement_factor_I             | TSSSFEVR.heavy        | 461,73 | 647,34 | -17,8 | y5 | 8,72  | -17,8 | 8,72  | 3 | y5 |
| Complement_factor_I             | TSSSFEVR.heavy        | 461,73 | 560,31 | -17,8 | y4 | 8,73  | -17,8 | 8,73  | 3 | y4 |
| Corticosteroid-binding_globulin | ITQDAQLK.light        | 458,76 | 215,14 | -17,8 | b2 | 6,49  | -17,8 | 6,49  | 3 | b2 |
| Corticosteroid-binding_globulin | ITQDAQLK.light        | 458,76 | 803,43 | -17,8 | y7 | 6,49  | -17,8 | 6,49  | 3 | y7 |
| Corticosteroid-binding_globulin | ITQDAQLK.light        | 458,76 | 702,38 | -17,8 | y6 | 6,49  | -17,8 | 6,49  | 3 | y6 |
| Corticosteroid-binding_globulin | ITQDAQLK.heavy        | 462,77 | 215,14 | -17,8 | b2 | 6,49  | -17,8 | 6,49  | 3 | b2 |
| Corticosteroid-binding_globulin | ITQDAQLK.heavy        | 462,77 | 811,44 | -17,8 | y7 | 6,49  | -17,8 | 6,49  | 3 | y7 |
| Corticosteroid-binding_globulin | ITQDAQLK.heavy        | 462,77 | 710,39 | -17,8 | y6 | 6,48  | -17,8 | 6,48  | 3 | y6 |
| Fibrinogen_alpha_chain          | GSESGIFTNTK.light     | 570,78 | 780,43 | -22,3 | y7 | 12,09 | -22,3 | 12,09 | 3 | y7 |
| Fibrinogen_alpha_chain          | GSESGIFTNTK.light     | 570,78 | 610,32 | -22,3 | y5 | 12,09 | -22,3 | 12,09 | 3 | y5 |
| Fibrinogen_alpha_chain          | GSESGIFTNTK.light     | 570,78 | 498,75 | -22,3 | y9 | 12,09 | -22,3 | 12,09 | 3 | y9 |
| Fibrinogen_alpha_chain          | GSESGIFTNTK.heavy     | 574,79 | 788,44 | -22,3 | y7 | 12,09 | -22,3 | 12,09 | 3 | y7 |
| Fibrinogen_alpha_chain          | GSESGIFTNTK.heavy     | 574,79 | 618,33 | -22,3 | y5 | 12,09 | -22,3 | 12,09 | 3 | y5 |
| Fibrinogen_alpha_chain          | GSESGIFTNTK.heavy     | 574,79 | 471,27 | -22,3 | y4 | 12,09 | -22,3 | 12,09 | 3 | y4 |
| Fibrinogen_alpha_chain          | GSESGIFTNTK.heavy     | 574,79 | 502,76 | -22,3 | y9 | 12,09 | -22,3 | 12,09 | 3 | y9 |
| Fibrinogen_alpha_chain          | ESSSHHPGIAEFPSR.light | 546,59 | 506,27 | -19,4 | y4 | 12,33 | -19,4 | 12,33 | 3 | y4 |
| Fibrinogen_alpha_chain          | ESSSHHPGIAEFPSR.light | 546,59 | 359,20 | -19,4 | y3 | 12,33 | -19,4 | 12,33 | 3 | y3 |
| Fibrinogen_alpha_chain          | ESSSHHPGIAEFPSR.light | 546,59 | 487,26 | -19,4 | y9 | 12,33 | -19,4 | 12,33 | 3 | y9 |
| Fibrinogen_alpha_chain          | ESSSHHPGIAEFPSR.heavy | 549,93 | 516,28 | -19,4 | y4 | 12,31 | -19,4 | 12,31 | 3 | y4 |
| Fibrinogen_alpha_chain          | ESSSHHPGIAEFPSR.heavy | 549,93 | 369,21 | -19,4 | y3 | 12,33 | -19,4 | 12,33 | 3 | y3 |
| Fibrinogen_alpha_chain          | ESSSHHPGIAEFPSR.heavy | 549,93 | 492,26 | -19,4 | y9 | 12,31 | -19,4 | 12,31 | 3 | y9 |
| Fibulin-1                       | GYHLNEEGTR.light      | 392,52 | 422,19 | -13,7 | b7 | 6,61  | -13,7 | 6,61  | 3 | b7 |
| Fibulin-1                       | GYHLNEEGTR.light      | 392,52 | 462,23 | -13,7 | y4 | 6,61  | -13,7 | 6,61  | 3 | y4 |
| Fibulin-1                       | GYHLNEEGTR.light      | 392,52 | 333,19 | -13,7 | y3 | 6,61  | -13,7 | 6,61  | 3 | y3 |
| Fibulin-1                       | GYHLNEEGTR.heavy      | 395,86 | 422,19 | -13,7 | b7 | 6,61  | -13,7 | 6,61  | 3 | b7 |



|             |                     |        |        |       |    |       |       |       |   |    |
|-------------|---------------------|--------|--------|-------|----|-------|-------|-------|---|----|
| Fibulin-1   | GYHLNEEGTR.heavy    | 395,86 | 472,24 | -13,7 | y4 | 6,61  | -13,7 | 6,61  | 3 | y4 |
| Fibulin-1   | GYHLNEEGTR.heavy    | 395,86 | 343,20 | -13,7 | y3 | 6,61  | -13,7 | 6,61  | 3 | y3 |
| Fibulin-1   | TGYFFDGISR.light    | 589,78 | 322,14 | -23,1 | b3 | 20,24 | -23,1 | 20,24 | 3 | b3 |
| Fibulin-1   | TGYFFDGISR.light    | 589,78 | 857,42 | -23,1 | y7 | 20,25 | -23,1 | 20,25 | 3 | y7 |
| Fibulin-1   | TGYFFDGISR.light    | 589,78 | 694,35 | -23,1 | y6 | 20,24 | -23,1 | 20,24 | 3 | y6 |
| Fibulin-1   | TGYFFDGISR.heavy    | 594,78 | 322,14 | -23,1 | b3 | 20,25 | -23,1 | 20,25 | 3 | b3 |
| Fibulin-1   | TGYFFDGISR.heavy    | 594,78 | 867,42 | -23,1 | y7 | 20,24 | -23,1 | 20,24 | 3 | y7 |
| Fibulin-1   | TGYFFDGISR.heavy    | 594,78 | 704,36 | -23,1 | y6 | 20,24 | -23,1 | 20,24 | 3 | y6 |
| Gelsolin    | AGALNSNDAFVLK.light | 660,35 | 200,10 | -25,9 | b3 | 22,11 | -25,9 | 22,11 | 3 | b3 |
| Gelsolin    | AGALNSNDAFVLK.light | 660,35 | 313,19 | -25,9 | b4 | 22,11 | -25,9 | 22,11 | 3 | b4 |
| Gelsolin    | AGALNSNDAFVLK.light | 660,35 | 260,20 | -25,9 | y2 | 22,11 | -25,9 | 22,11 | 3 | y2 |
| Gelsolin    | AGALNSNDAFVLK.heavy | 664,36 | 200,10 | -25,9 | b3 | 22,11 | -25,9 | 22,11 | 3 | b3 |
| Gelsolin    | AGALNSNDAFVLK.heavy | 664,36 | 313,19 | -25,9 | b4 | 22,09 | -25,9 | 22,09 | 3 | b4 |
| Gelsolin    | AGALNSNDAFVLK.heavy | 664,36 | 268,21 | -25,9 | y2 | 22,13 | -25,9 | 22,13 | 3 | y2 |
| Gelsolin    | TASDFITK.light      | 441,73 | 781,41 | -17,2 | y7 | 11,6  | -17,2 | 11,6  | 3 | y7 |
| Gelsolin    | TASDFITK.light      | 441,73 | 710,37 | -17,2 | y6 | 11,6  | -17,2 | 11,6  | 3 | y6 |
| Gelsolin    | TASDFITK.light      | 441,73 | 248,16 | -17,2 | y2 | 11,6  | -17,2 | 11,6  | 3 | y2 |
| Gelsolin    | TASDFITK.heavy      | 445,74 | 789,42 | -17,2 | y7 | 11,59 | -17,2 | 11,59 | 3 | y7 |
| Gelsolin    | TASDFITK.heavy      | 445,74 | 718,39 | -17,2 | y6 | 11,59 | -17,2 | 11,59 | 3 | y6 |
| Gelsolin    | TASDFITK.heavy      | 445,74 | 256,17 | -17,2 | y2 | 11,59 | -17,2 | 11,59 | 3 | y2 |
| Haptoglobin | DYAEVGR.light       | 405,19 | 279,10 | -15,7 | b2 | 6,66  | -15,7 | 6,66  | 3 | b2 |
| Haptoglobin | DYAEVGR.light       | 405,19 | 531,29 | -15,7 | y5 | 6,66  | -15,7 | 6,66  | 3 | y5 |
| Haptoglobin | DYAEVGR.light       | 405,19 | 460,25 | -15,7 | y4 | 6,66  | -15,7 | 6,66  | 3 | y4 |
| Haptoglobin | DYAEVGR.heavy       | 410,20 | 279,10 | -15,7 | b2 | 6,66  | -15,7 | 6,66  | 3 | b2 |
| Haptoglobin | DYAEVGR.heavy       | 410,20 | 541,30 | -15,7 | y5 | 6,66  | -15,7 | 6,66  | 3 | y5 |
| Haptoglobin | DYAEVGR.heavy       | 410,20 | 470,26 | -15,7 | y4 | 6,66  | -15,7 | 6,66  | 3 | y4 |
| Haptoglobin | HYEGSTVPEK.light    | 573,77 | 301,13 | -22,4 | b2 | 4,45  | -22,4 | 4,45  | 3 | b2 |
| Haptoglobin | HYEGSTVPEK.light    | 573,77 | 846,42 | -22,4 | y8 | 4,45  | -22,4 | 4,45  | 3 | y8 |
| Haptoglobin | HYEGSTVPEK.light    | 573,77 | 373,21 | -22,4 | y3 | 4,45  | -22,4 | 4,45  | 3 | y3 |
| Haptoglobin | HYEGSTVPEK.heavy    | 577,78 | 301,13 | -22,4 | b2 | 4,45  | -22,4 | 4,45  | 3 | b2 |
| Haptoglobin | HYEGSTVPEK.heavy    | 577,78 | 854,43 | -22,4 | y8 | 4,45  | -22,4 | 4,45  | 3 | y8 |
| Haptoglobin | HYEGSTVPEK.heavy    | 577,78 | 381,22 | -22,4 | y3 | 4,45  | -22,4 | 4,45  | 3 | y3 |

|                          |                        |        |        |       |     |       |       |       |   |     |
|--------------------------|------------------------|--------|--------|-------|-----|-------|-------|-------|---|-----|
| Hemoglobin_subunit_alpha | TYFPHFDLSHGSAQVK.light | 611,97 | 711,86 | -21,8 | y13 | 23,15 | -21,8 | 23,15 | 3 | y13 |
| Hemoglobin_subunit_alpha | TYFPHFDLSHGSAQVK.light | 611,97 | 523,93 | -21,8 | y14 | 23,15 | -21,8 | 23,15 | 3 | y14 |
| Hemoglobin_subunit_alpha | TYFPHFDLSHGSAQVK.light | 611,97 | 442,56 | -21,8 | y12 | 23,15 | -21,8 | 23,15 | 3 | y12 |
| Hemoglobin_subunit_alpha | TYFPHFDLSHGSAQVK.heavy | 614,64 | 715,87 | -21,8 | y13 | 23,15 | -21,8 | 23,15 | 3 | y13 |
| Hemoglobin_subunit_alpha | TYFPHFDLSHGSAQVK.heavy | 614,64 | 526,60 | -21,8 | y14 | 23,16 | -21,8 | 23,16 | 3 | y14 |
| Hemoglobin_subunit_alpha | TYFPHFDLSHGSAQVK.heavy | 614,64 | 445,23 | -21,8 | y12 | 23,16 | -21,8 | 23,16 | 3 | y12 |
| Hemoglobin_subunit_alpha | VGAHAGEYGAEALER.light  | 510,58 | 617,33 | -18,1 | y5  | 12,79 | -18,1 | 12,79 | 3 | y5  |
| Hemoglobin_subunit_alpha | VGAHAGEYGAEALER.light  | 510,58 | 488,28 | -18,1 | y4  | 12,79 | -18,1 | 12,79 | 3 | y4  |
| Hemoglobin_subunit_alpha | VGAHAGEYGAEALER.light  | 510,58 | 417,25 | -18,1 | y3  | 12,79 | -18,1 | 12,79 | 3 | y3  |
| Hemoglobin_subunit_alpha | VGAHAGEYGAEALER.heavy  | 513,92 | 627,33 | -18,1 | y5  | 12,79 | -18,1 | 12,79 | 3 | y5  |
| Hemoglobin_subunit_alpha | VGAHAGEYGAEALER.heavy  | 513,92 | 498,29 | -18,1 | y4  | 12,79 | -18,1 | 12,79 | 3 | y4  |
| Hemoglobin_subunit_alpha | VGAHAGEYGAEALER.heavy  | 513,92 | 427,25 | -18,1 | y3  | 12,79 | -18,1 | 12,79 | 3 | y3  |
| sp P02790 HEMO_HUMAN     | NFPSPVDAAFR.light      | 610,81 | 959,49 | -23,9 | y9  | 25,39 | -23,9 | 25,39 | 3 | y9  |
| sp P02790 HEMO_HUMAN     | NFPSPVDAAFR.light      | 610,81 | 775,41 | -23,9 | y7  | 25,38 | -23,9 | 25,38 | 3 | y7  |
| sp P02790 HEMO_HUMAN     | NFPSPVDAAFR.light      | 610,81 | 464,26 | -23,9 | y4  | 25,39 | -23,9 | 25,39 | 3 | y4  |
| sp P02790 HEMO_HUMAN     | NFPSPVDAAFR.light      | 610,81 | 480,25 | -23,9 | y9  | 25,37 | -23,9 | 25,37 | 3 | y9  |
| sp P02790 HEMO_HUMAN     | NFPSPVDAAFR.heavy      | 615,81 | 969,50 | -23,9 | y9  | 25,36 | -23,9 | 25,36 | 3 | y9  |
| sp P02790 HEMO_HUMAN     | NFPSPVDAAFR.heavy      | 615,81 | 785,42 | -23,9 | y7  | 25,38 | -23,9 | 25,38 | 3 | y7  |
| sp P02790 HEMO_HUMAN     | NFPSPVDAAFR.heavy      | 615,81 | 474,27 | -23,9 | y4  | 25,38 | -23,9 | 25,38 | 3 | y4  |
| sp P02790 HEMO_HUMAN     | NFPSPVDAAFR.heavy      | 615,81 | 485,26 | -23,9 | y9  | 25,39 | -23,9 | 25,39 | 3 | y9  |
| Heparin_cofactor_2       | TLEAQLTPR.light        | 514,79 | 814,44 | -20,1 | y7  | 15,43 | -20,1 | 15,43 | 3 | y7  |
| Heparin_cofactor_2       | TLEAQLTPR.light        | 514,79 | 685,40 | -20,1 | y6  | 15,43 | -20,1 | 15,43 | 3 | y6  |
| Heparin_cofactor_2       | TLEAQLTPR.light        | 514,79 | 373,22 | -20,1 | y3  | 15,43 | -20,1 | 15,43 | 3 | y3  |
| Heparin_cofactor_2       | TLEAQLTPR.light        | 514,79 | 344,18 | -20,1 | b3  | 15,43 | -20,1 | 15,43 | 3 | b3  |
| Heparin_cofactor_2       | TLEAQLTPR.heavy        | 519,79 | 824,45 | -20,1 | y7  | 15,43 | -20,1 | 15,43 | 3 | y7  |
| Heparin_cofactor_2       | TLEAQLTPR.heavy        | 519,79 | 695,41 | -20,1 | y6  | 15,43 | -20,1 | 15,43 | 3 | y6  |
| Heparin_cofactor_2       | TLEAQLTPR.heavy        | 519,79 | 383,23 | -20,1 | y3  | 15,43 | -20,1 | 15,43 | 3 | y3  |
| Heparin_cofactor_2       | TLEAQLTPR.heavy        | 519,79 | 344,18 | -20,1 | b3  | 15,44 | -20,1 | 15,44 | 3 | b3  |
| Heparin_cofactor_2       | SVNDLYIQK.light        | 540,29 | 187,11 | -21,1 | b2  | 15,05 | -21,1 | 15,05 | 3 | b2  |
| Heparin_cofactor_2       | SVNDLYIQK.light        | 540,29 | 893,47 | -21,1 | y7  | 15,05 | -21,1 | 15,05 | 3 | y7  |
| Heparin_cofactor_2       | SVNDLYIQK.light        | 540,29 | 551,32 | -21,1 | y4  | 15,05 | -21,1 | 15,05 | 3 | y4  |
| Heparin_cofactor_2       | SVNDLYIQK.heavy        | 544,30 | 187,11 | -21,1 | b2  | 15,05 | -21,1 | 15,05 | 3 | b2  |

|                                                                |                      |        |        |       |     |       |       |       |   |     |
|----------------------------------------------------------------|----------------------|--------|--------|-------|-----|-------|-------|-------|---|-----|
| Heparin_cofactor_2                                             | SVNDLYIQK.heavy      | 544,30 | 901,49 | -21,1 | y7  | 15,04 | -21,1 | 15,04 | 3 | y7  |
| Heparin_cofactor_2                                             | SVNDLYIQK.heavy      | 544,30 | 559,33 | -21,1 | y4  | 15,04 | -21,1 | 15,04 | 3 | y4  |
| Insulin-like_growth_factor_binding_protein_acid_labile_subunit | LAELPADALGPLQR.light | 732,41 | 314,17 | -28,8 | b3  | 29,55 | -28,8 | 29,55 | 3 | b3  |
| Insulin-like_growth_factor_binding_protein_acid_labile_subunit | LAELPADALGPLQR.light | 732,41 | 427,26 | -28,8 | b4  | 29,55 | -28,8 | 29,55 | 3 | b4  |
| Insulin-like_growth_factor_binding_protein_acid_labile_subunit | LAELPADALGPLQR.light | 732,41 | 519,29 | -28,8 | y10 | 29,55 | -28,8 | 29,55 | 3 | y10 |
| Insulin-like_growth_factor_binding_protein_acid_labile_subunit | LAELPADALGPLQR.heavy | 737,42 | 524,29 | -28,8 | y10 | 29,55 | -28,8 | 29,55 | 3 | y10 |
| Insulin-like_growth_factor_binding_protein_acid_labile_subunit | LAELPADALGPLQR.heavy | 737,42 | 314,17 | -28,8 | b3  | 29,55 | -28,8 | 29,55 | 3 | b3  |
| Insulin-like_growth_factor_binding_protein_acid_labile_subunit | LAELPADALGPLQR.heavy | 737,42 | 427,26 | -28,8 | b4  | 29,54 | -28,8 | 29,54 | 3 | b4  |
| Insulin-like_growth_factor-binding_protein_3                   | FLNVLSPR.light       | 473,28 | 685,40 | -18,4 | y6  | 23,93 | -18,4 | 23,93 | 3 | y6  |
| Insulin-like_growth_factor-binding_protein_3                   | FLNVLSPR.light       | 473,28 | 472,29 | -18,4 | y4  | 23,94 | -18,4 | 23,94 | 3 | y4  |
| Insulin-like_growth_factor-binding_protein_3                   | FLNVLSPR.light       | 473,28 | 359,20 | -18,4 | y3  | 23,94 | -18,4 | 23,94 | 3 | y3  |
| Insulin-like_growth_factor-binding_protein_3                   | FLNVLSPR.heavy       | 478,28 | 695,41 | -18,4 | y6  | 23,94 | -18,4 | 23,94 | 3 | y6  |
| Insulin-like_growth_factor-binding_protein_3                   | FLNVLSPR.heavy       | 478,28 | 482,30 | -18,4 | y4  | 23,94 | -18,4 | 23,94 | 3 | y4  |
| Insulin-like_growth_factor-binding_protein_3                   | FLNVLSPR.heavy       | 478,28 | 369,21 | -18,4 | y3  | 23,95 | -18,4 | 23,95 | 3 | y3  |
| Inter-alpha-trypsin_inhibitor_heavy_chain_H2                   | FYNQVSTPLLR.light    | 669,36 | 686,42 | -26,3 | y6  | 24,16 | -26,3 | 24,16 | 3 | y6  |
| Inter-alpha-trypsin_inhibitor_heavy_chain_H2                   | FYNQVSTPLLR.light    | 669,36 | 498,34 | -26,3 | y4  | 24,16 | -26,3 | 24,16 | 3 | y4  |
| Inter-alpha-trypsin_inhibitor_heavy_chain_H2                   | FYNQVSTPLLR.light    | 669,36 | 514,30 | -26,3 | y9  | 24,16 | -26,3 | 24,16 | 3 | y9  |
| Inter-alpha-trypsin_inhibitor_heavy_chain_H2                   | FYNQVSTPLLR.heavy    | 674,37 | 696,43 | -26,3 | y6  | 24,15 | -26,3 | 24,15 | 3 | y6  |
| Inter-alpha-trypsin_inhibitor_heavy_chain_H2                   | FYNQVSTPLLR.heavy    | 674,37 | 508,35 | -26,3 | y4  | 24,16 | -26,3 | 24,16 | 3 | y4  |
| Inter-alpha-trypsin_inhibitor_heavy_chain_H2                   | FYNQVSTPLLR.heavy    | 674,37 | 519,30 | -26,3 | y9  | 24,16 | -26,3 | 24,16 | 3 | y9  |
| Inter-alpha-trypsin_inhibitor_heavy_chain_H2                   | SLAPTAAAK.light      | 415,24 | 272,16 | -16,1 | b3  | 7,36  | -16,1 | 7,36  | 3 | b3  |
| Inter-alpha-trypsin_inhibitor_heavy_chain_H2                   | SLAPTAAAK.light      | 415,24 | 629,36 | -16,1 | y7  | 7,36  | -16,1 | 7,36  | 3 | y7  |
| Inter-alpha-trypsin_inhibitor_heavy_chain_H2                   | SLAPTAAAK.light      | 415,24 | 558,32 | -16,1 | y6  | 7,36  | -16,1 | 7,36  | 3 | y6  |
| Inter-alpha-trypsin_inhibitor_heavy_chain_H2                   | SLAPTAAAK.heavy      | 419,25 | 272,16 | -16,1 | b3  | 7,36  | -16,1 | 7,36  | 3 | b3  |
| Inter-alpha-trypsin_inhibitor_heavy_chain_H2                   | SLAPTAAAK.heavy      | 419,25 | 637,38 | -16,1 | y7  | 7,36  | -16,1 | 7,36  | 3 | y7  |
| Inter-alpha-trypsin_inhibitor_heavy_chain_H2                   | SLAPTAAAK.heavy      | 419,25 | 566,34 | -16,1 | y6  | 7,36  | -16,1 | 7,36  | 3 | y6  |
| Lipopolysaccharide-binding_protein                             | ITLPDFTGDLR.light    | 624,34 | 920,45 | -24,5 | y8  | 33,06 | -24,5 | 33,06 | 3 | y8  |
| Lipopolysaccharide-binding_protein                             | ITLPDFTGDLR.light    | 624,34 | 517,27 | -24,5 | y9  | 33,06 | -24,5 | 33,06 | 3 | y9  |
| Lipopolysaccharide-binding_protein                             | ITLPDFTGDLR.light    | 624,34 | 460,73 | -24,5 | y8  | 33,07 | -24,5 | 33,07 | 3 | y8  |

|                                    |                   |        |        |       |    |       |       |       |   |    |
|------------------------------------|-------------------|--------|--------|-------|----|-------|-------|-------|---|----|
| Lipopolysaccharide-binding_protein | ITLPDFTGDLR.heavy | 629,34 | 930,46 | -24,5 | y8 | 33,06 | -24,5 | 33,06 | 3 | y8 |
| Lipopolysaccharide-binding_protein | ITLPDFTGDLR.heavy | 629,34 | 522,27 | -24,5 | y9 | 33,07 | -24,5 | 33,07 | 3 | y9 |
| Lipopolysaccharide-binding_protein | ITLPDFTGDLR.heavy | 629,34 | 465,73 | -24,5 | y8 | 33,06 | -24,5 | 33,06 | 3 | y8 |
| Lumican                            | FNALQYLR.light    | 512,78 | 262,12 | -20   | b2 | 27,2  | -20   | 27,2  | 3 | b2 |
| Lumican                            | FNALQYLR.light    | 512,78 | 763,45 | -20   | y6 | 27,21 | -20   | 27,21 | 3 | y6 |
| Lumican                            | FNALQYLR.light    | 512,78 | 579,32 | -20   | y4 | 27,21 | -20   | 27,21 | 3 | y4 |
| Lumican                            | FNALQYLR.heavy    | 517,79 | 262,12 | -20   | b2 | 27,2  | -20   | 27,2  | 3 | b2 |
| Lumican                            | FNALQYLR.heavy    | 517,79 | 773,45 | -20   | y6 | 27,21 | -20   | 27,21 | 3 | y6 |
| Lumican                            | FNALQYLR.heavy    | 517,79 | 589,33 | -20   | y4 | 27,21 | -20   | 27,21 | 3 | y4 |
| Neuropilin-2                       | ALQVVR.light      | 343,22 | 313,19 | -13,2 | b3 | 9,12  | -13,2 | 9,12  | 3 | b3 |
| Neuropilin-2                       | ALQVVR.light      | 343,22 | 501,31 | -13,2 | y4 | 9,11  | -13,2 | 9,11  | 3 | y4 |
| Neuropilin-2                       | ALQVVR.light      | 343,22 | 373,26 | -13,2 | y3 | 9,12  | -13,2 | 9,12  | 3 | y3 |
| Neuropilin-2                       | ALQVVR.heavy      | 348,23 | 313,19 | -13,2 | b3 | 9,11  | -13,2 | 9,11  | 3 | b3 |
| Neuropilin-2                       | ALQVVR.heavy      | 348,23 | 511,32 | -13,2 | y4 | 9,12  | -13,2 | 9,12  | 3 | y4 |
| Neuropilin-2                       | ALQVVR.heavy      | 348,23 | 383,26 | -13,2 | y3 | 9,11  | -13,2 | 9,11  | 3 | y3 |
| PEDF                               | TVQAVLTVPK.light  | 528,33 | 329,18 | -20,6 | b3 | 19,63 | -20,6 | 19,63 | 3 | b3 |
| PEDF                               | TVQAVLTVPK.light  | 528,33 | 727,47 | -20,6 | y7 | 19,63 | -20,6 | 19,63 | 3 | y7 |
| PEDF                               | TVQAVLTVPK.light  | 528,33 | 557,37 | -20,6 | y5 | 19,63 | -20,6 | 19,63 | 3 | y5 |
| PEDF                               | TVQAVLTVPK.heavy  | 532,33 | 329,18 | -20,6 | b3 | 19,63 | -20,6 | 19,63 | 3 | b3 |
| PEDF                               | TVQAVLTVPK.heavy  | 532,33 | 735,49 | -20,6 | y7 | 19,63 | -20,6 | 19,63 | 3 | y7 |
| PEDF                               | TVQAVLTVPK.heavy  | 532,33 | 565,38 | -20,6 | y5 | 19,63 | -20,6 | 19,63 | 3 | y5 |
| sp P02753 RET4_HUMAN               | YWGVASFLQK.light  | 599,82 | 849,48 | -23,5 | y8 | 33,14 | -23,5 | 33,14 | 3 | y8 |
| sp P02753 RET4_HUMAN               | YWGVASFLQK.light  | 599,82 | 693,39 | -23,5 | y6 | 33,14 | -23,5 | 33,14 | 3 | y6 |
| sp P02753 RET4_HUMAN               | YWGVASFLQK.light  | 599,82 | 407,17 | -23,5 | b3 | 33,14 | -23,5 | 33,14 | 3 | b3 |
| sp P02753 RET4_HUMAN               | YWGVASFLQK.heavy  | 603,82 | 857,50 | -23,5 | y8 | 33,14 | -23,5 | 33,14 | 3 | y8 |
| sp P02753 RET4_HUMAN               | YWGVASFLQK.heavy  | 603,82 | 701,41 | -23,5 | y6 | 33,15 | -23,5 | 33,15 | 3 | y6 |
| sp P02753 RET4_HUMAN               | YWGVASFLQK.heavy  | 603,82 | 407,17 | -23,5 | b3 | 33,12 | -23,5 | 33,12 | 3 | b3 |
| Protein_AMBP                       | ETLLQDFR.light    | 511,27 | 678,36 | -19,9 | y5 | 23,4  | -19,9 | 23,4  | 3 | y5 |
| Protein_AMBP                       | ETLLQDFR.light    | 511,27 | 565,27 | -19,9 | y4 | 23,4  | -19,9 | 23,4  | 3 | y4 |
| Protein_AMBP                       | ETLLQDFR.light    | 511,27 | 437,21 | -19,9 | y3 | 23,4  | -19,9 | 23,4  | 3 | y3 |
| Protein_AMBP                       | ETLLQDFR.heavy    | 516,27 | 688,37 | -19,9 | y5 | 23,4  | -19,9 | 23,4  | 3 | y5 |
| Protein_AMBP                       | ETLLQDFR.heavy    | 516,27 | 575,28 | -19,9 | y4 | 23,4  | -19,9 | 23,4  | 3 | y4 |

|                           |                    |        |         |       |    |       |       |       |   |    |
|---------------------------|--------------------|--------|---------|-------|----|-------|-------|-------|---|----|
| Protein_AMBP              | ETLLQDFR.heavy     | 516,27 | 447,22  | -19,9 | y3 | 23,4  | -19,9 | 23,4  | 3 | y3 |
| Protein_AMBP              | HHGPTITAK.light    | 481,26 | 687,40  | -18,7 | y7 | 3,12  | -18,7 | 3,12  | 3 | y7 |
| Protein_AMBP              | HHGPTITAK.light    | 481,26 | 319,20  | -18,7 | y3 | 3,12  | -18,7 | 3,12  | 3 | y3 |
| Protein_AMBP              | HHGPTITAK.light    | 481,26 | 412,73  | -18,7 | y8 | 3,11  | -18,7 | 3,11  | 3 | y8 |
| Protein_AMBP              | HHGPTITAK.heavy    | 485,27 | 695,42  | -18,7 | y7 | 3,12  | -18,7 | 3,12  | 3 | y7 |
| Protein_AMBP              | HHGPTITAK.heavy    | 485,27 | 327,21  | -18,7 | y3 | 3,12  | -18,7 | 3,12  | 3 | y3 |
| Protein_AMBP              | HHGPTITAK.heavy    | 485,27 | 416,74  | -18,7 | y8 | 3,11  | -18,7 | 3,11  | 3 | y8 |
| Prothrombin               | ELLESYIDGR.light   | 597,80 | 485,26  | -23,4 | b4 | 23,29 | -23,4 | 23,29 | 3 | b4 |
| Prothrombin               | ELLESYIDGR.light   | 597,80 | 710,35  | -23,4 | y6 | 23,29 | -23,4 | 23,29 | 3 | y6 |
| Prothrombin               | ELLESYIDGR.light   | 597,80 | 623,31  | -23,4 | y5 | 23,29 | -23,4 | 23,29 | 3 | y5 |
| Prothrombin               | ELLESYIDGR.heavy   | 602,81 | 485,26  | -23,4 | b4 | 23,29 | -23,4 | 23,29 | 3 | b4 |
| Prothrombin               | ELLESYIDGR.heavy   | 602,81 | 720,36  | -23,4 | y6 | 23,27 | -23,4 | 23,27 | 3 | y6 |
| Prothrombin               | ELLESYIDGR.heavy   | 602,81 | 633,32  | -23,4 | y5 | 23,29 | -23,4 | 23,29 | 3 | y5 |
| Prothrombin               | TATSEYQTFNPR.light | 781,37 | 1072,52 | -30,7 | y8 | 23,47 | -30,7 | 23,47 | 3 | y8 |
| Prothrombin               | TATSEYQTFNPR.light | 781,37 | 680,35  | -30,7 | y5 | 23,47 | -30,7 | 23,47 | 3 | y5 |
| Prothrombin               | TATSEYQTFNPR.light | 781,37 | 272,17  | -30,7 | y2 | 23,47 | -30,7 | 23,47 | 3 | y2 |
| Prothrombin               | TATSEYQTFNPR.heavy | 786,37 | 1082,53 | -30,7 | y8 | 23,45 | -30,7 | 23,45 | 3 | y8 |
| Prothrombin               | TATSEYQTFNPR.heavy | 786,37 | 690,36  | -30,7 | y5 | 23,45 | -30,7 | 23,45 | 3 | y5 |
| Prothrombin               | TATSEYQTFNPR.heavy | 786,37 | 282,18  | -30,7 | y2 | 23,47 | -30,7 | 23,47 | 3 | y2 |
| Transferrin               | DGAGDVAFVK.light   | 489,75 | 244,09  | -19,1 | b3 | 15,63 | -19,1 | 15,63 | 3 | b3 |
| Transferrin               | DGAGDVAFVK.light   | 489,75 | 735,40  | -19,1 | y7 | 15,63 | -19,1 | 15,63 | 3 | y7 |
| Transferrin               | DGAGDVAFVK.light   | 489,75 | 464,29  | -19,1 | y4 | 15,63 | -19,1 | 15,63 | 3 | y4 |
| Transferrin               | DGAGDVAFVK.heavy   | 493,76 | 244,09  | -19,1 | b3 | 15,63 | -19,1 | 15,63 | 3 | b3 |
| Transferrin               | DGAGDVAFVK.heavy   | 493,76 | 743,42  | -19,1 | y7 | 15,63 | -19,1 | 15,63 | 3 | y7 |
| Transferrin               | DGAGDVAFVK.heavy   | 493,76 | 472,30  | -19,1 | y4 | 15,63 | -19,1 | 15,63 | 3 | y4 |
| Transferrin               | EGYYGYTGAFR.light  | 642,29 | 350,13  | -25,2 | b3 | 19,57 | -25,2 | 19,57 | 3 | b3 |
| Transferrin               | EGYYGYTGAFR.light  | 642,29 | 771,38  | -25,2 | y7 | 19,56 | -25,2 | 19,56 | 3 | y7 |
| Transferrin               | EGYYGYTGAFR.light  | 642,29 | 551,29  | -25,2 | y5 | 19,57 | -25,2 | 19,57 | 3 | y5 |
| Transferrin               | EGYYGYTGAFR.heavy  | 647,29 | 350,13  | -25,2 | b3 | 19,55 | -25,2 | 19,55 | 3 | b3 |
| Transferrin               | EGYYGYTGAFR.heavy  | 647,29 | 781,39  | -25,2 | y7 | 19,56 | -25,2 | 19,56 | 3 | y7 |
| Transferrin               | EGYYGYTGAFR.heavy  | 647,29 | 561,30  | -25,2 | y5 | 19,56 | -25,2 | 19,56 | 3 | y5 |
| Serum_amyloid_A-4_protein | GNYDAAQR.light     | 447,71 | 723,34  | -17,4 | y6 | 3,13  | -17,4 | 3,13  | 3 | y6 |

|                               |                  |        |        |       |    |       |       |       |   |    |
|-------------------------------|------------------|--------|--------|-------|----|-------|-------|-------|---|----|
| Serum_amyloid_A-4_protein     | GNYDAAQR.light   | 447,71 | 445,25 | -17,4 | y4 | 3,13  | -17,4 | 3,13  | 3 | y4 |
| Serum_amyloid_A-4_protein     | GNYDAAQR.light   | 447,71 | 374,21 | -17,4 | y3 | 3,13  | -17,4 | 3,13  | 3 | y3 |
| Serum_amyloid_A-4_protein     | GNYDAAQR.heavy   | 452,71 | 733,35 | -17,4 | y6 | 3,13  | -17,4 | 3,13  | 3 | y6 |
| Serum_amyloid_A-4_protein     | GNYDAAQR.heavy   | 452,71 | 455,26 | -17,4 | y4 | 3,13  | -17,4 | 3,13  | 3 | y4 |
| Serum_amyloid_A-4_protein     | GNYDAAQR.heavy   | 452,71 | 384,22 | -17,4 | y3 | 3,13  | -17,4 | 3,13  | 3 | y3 |
| Thyroxine-binding_globulin    | AVLHIGEK.light   | 289,51 | 398,24 | -9,9  | y7 | 10,25 | -9,9  | 10,25 | 3 | y7 |
| Thyroxine-binding_globulin    | AVLHIGEK.light   | 289,51 | 348,71 | -9,9  | y6 | 10,21 | -9,9  | 10,21 | 3 | y6 |
| Thyroxine-binding_globulin    | AVLHIGEK.light   | 289,51 | 292,16 | -9,9  | y5 | 10,25 | -9,9  | 10,25 | 3 | y5 |
| Thyroxine-binding_globulin    | AVLHIGEK.heavy   | 292,18 | 402,25 | -9,9  | y7 | 10,21 | -9,9  | 10,21 | 3 | y7 |
| Thyroxine-binding_globulin    | AVLHIGEK.heavy   | 292,18 | 352,71 | -9,9  | y6 | 10,16 | -9,9  | 10,16 | 3 | y6 |
| Thyroxine-binding_globulin    | AVLHIGEK.heavy   | 292,18 | 296,17 | -9,9  | y5 | 10,16 | -9,9  | 10,16 | 3 | y5 |
| Vitamin_D-binding_protein     | THLPEVFLSK.light | 390,89 | 494,30 | -13,6 | y4 | 21,68 | -13,6 | 21,68 | 3 | y4 |
| Vitamin_D-binding_protein     | THLPEVFLSK.light | 390,89 | 347,23 | -13,6 | y3 | 21,68 | -13,6 | 21,68 | 3 | y3 |
| Vitamin_D-binding_protein     | THLPEVFLSK.light | 390,89 | 352,20 | -13,6 | b3 | 21,7  | -13,6 | 21,7  | 3 | b3 |
| Vitamin_D-binding_protein     | THLPEVFLSK.light | 390,89 | 578,29 | -13,6 | b5 | 21,7  | -13,6 | 21,7  | 3 | b5 |
| Vitamin_D-binding_protein     | THLPEVFLSK.heavy | 393,56 | 502,31 | -13,6 | y4 | 21,68 | -13,6 | 21,68 | 3 | y4 |
| Vitamin_D-binding_protein     | THLPEVFLSK.heavy | 393,56 | 355,24 | -13,6 | y3 | 21,68 | -13,6 | 21,68 | 3 | y3 |
| Vitamin_D-binding_protein     | THLPEVFLSK.heavy | 393,56 | 352,20 | -13,6 | b3 | 21,68 | -13,6 | 21,68 | 3 | b3 |
| Vitamin_D-binding_protein     | THLPEVFLSK.heavy | 393,56 | 578,29 | -13,6 | b5 | 21,68 | -13,6 | 21,68 | 3 | b5 |
| Vitamin_D-binding_protein     | ELPEHTVK.light   | 318,17 | 613,33 | -10,9 | y5 | 5,77  | -10,9 | 5,77  | 3 | y5 |
| Vitamin_D-binding_protein     | ELPEHTVK.light   | 318,17 | 355,70 | -10,9 | y6 | 5,77  | -10,9 | 5,77  | 3 | y6 |
| Vitamin_D-binding_protein     | ELPEHTVK.light   | 318,17 | 237,47 | -10,9 | y6 | 5,77  | -10,9 | 5,77  | 3 | y6 |
| Vitamin_D-binding_protein     | ELPEHTVK.heavy   | 320,85 | 621,34 | -10,9 | y5 | 5,77  | -10,9 | 5,77  | 3 | y5 |
| Vitamin_D-binding_protein     | ELPEHTVK.heavy   | 320,85 | 359,70 | -10,9 | y6 | 5,77  | -10,9 | 5,77  | 3 | y6 |
| Vitamin_D-binding_protein     | ELPEHTVK.heavy   | 320,85 | 240,14 | -10,9 | y6 | 5,77  | -10,9 | 5,77  | 3 | y6 |
| Vitamin_K-dependent_protein_S | VYFAGFPR.light   | 478,75 | 694,37 | -18,6 | y6 | 23,84 | -18,6 | 23,84 | 3 | y6 |
| Vitamin_K-dependent_protein_S | VYFAGFPR.light   | 478,75 | 547,30 | -18,6 | y5 | 23,84 | -18,6 | 23,84 | 3 | y5 |
| Vitamin_K-dependent_protein_S | VYFAGFPR.light   | 478,75 | 476,26 | -18,6 | y4 | 23,84 | -18,6 | 23,84 | 3 | y4 |
| Vitamin_K-dependent_protein_S | VYFAGFPR.heavy   | 483,76 | 704,38 | -18,6 | y6 | 23,83 | -18,6 | 23,83 | 3 | y6 |
| Vitamin_K-dependent_protein_S | VYFAGFPR.heavy   | 483,76 | 557,31 | -18,6 | y5 | 23,83 | -18,6 | 23,83 | 3 | y5 |
| Vitamin_K-dependent_protein_S | VYFAGFPR.heavy   | 483,76 | 486,27 | -18,6 | y4 | 23,83 | -18,6 | 23,83 | 3 | y4 |
| Beta-2-glycoprotein 1         | ATVVYQGER.light  | 511,77 | 850,44 | -20   | y7 | 7,9   | -20   | 7,9   | 3 | y7 |

|                       |                 |        |        |     |    |     |     |     |   |    |
|-----------------------|-----------------|--------|--------|-----|----|-----|-----|-----|---|----|
| Beta-2-glycoprotein 1 | ATVVYQGER.light | 511,77 | 751,37 | -20 | y6 | 7,9 | -20 | 7,9 | 3 | y6 |
| Beta-2-glycoprotein 1 | ATVVYQGER.light | 511,77 | 652,30 | -20 | y5 | 7,9 | -20 | 7,9 | 3 | y5 |
| Beta-2-glycoprotein 1 | ATVVYQGER.light | 511,77 | 662,35 | -20 | b6 | 7,9 | -20 | 7,9 | 3 | b6 |
| Beta-2-glycoprotein 1 | ATVVYQGER.heavy | 516,77 | 860,45 | -20 | y7 | 7,9 | -20 | 7,9 | 3 | y7 |
| Beta-2-glycoprotein 1 | ATVVYQGER.heavy | 516,77 | 761,38 | -20 | y6 | 7,9 | -20 | 7,9 | 3 | y6 |
| Beta-2-glycoprotein 1 | ATVVYQGER.heavy | 516,77 | 662,31 | -20 | y5 | 7,9 | -20 | 7,9 | 3 | y5 |
| Beta-2-glycoprotein 1 | ATVVYQGER.heavy | 516,77 | 662,35 | -20 | b6 | 7,9 | -20 | 7,9 | 3 | b6 |

**Figure S1: LC-MRM chromatogram and calibration curves**

Panel A: LC-MRM chromatogram showing many eluting peptides (diagrammed with different colors and a three code letters corresponding to the three first amino-acids) over the peptide elution range (between 1 and 37 minutes). On the y axis, MS intensities of all the peptides were reported.

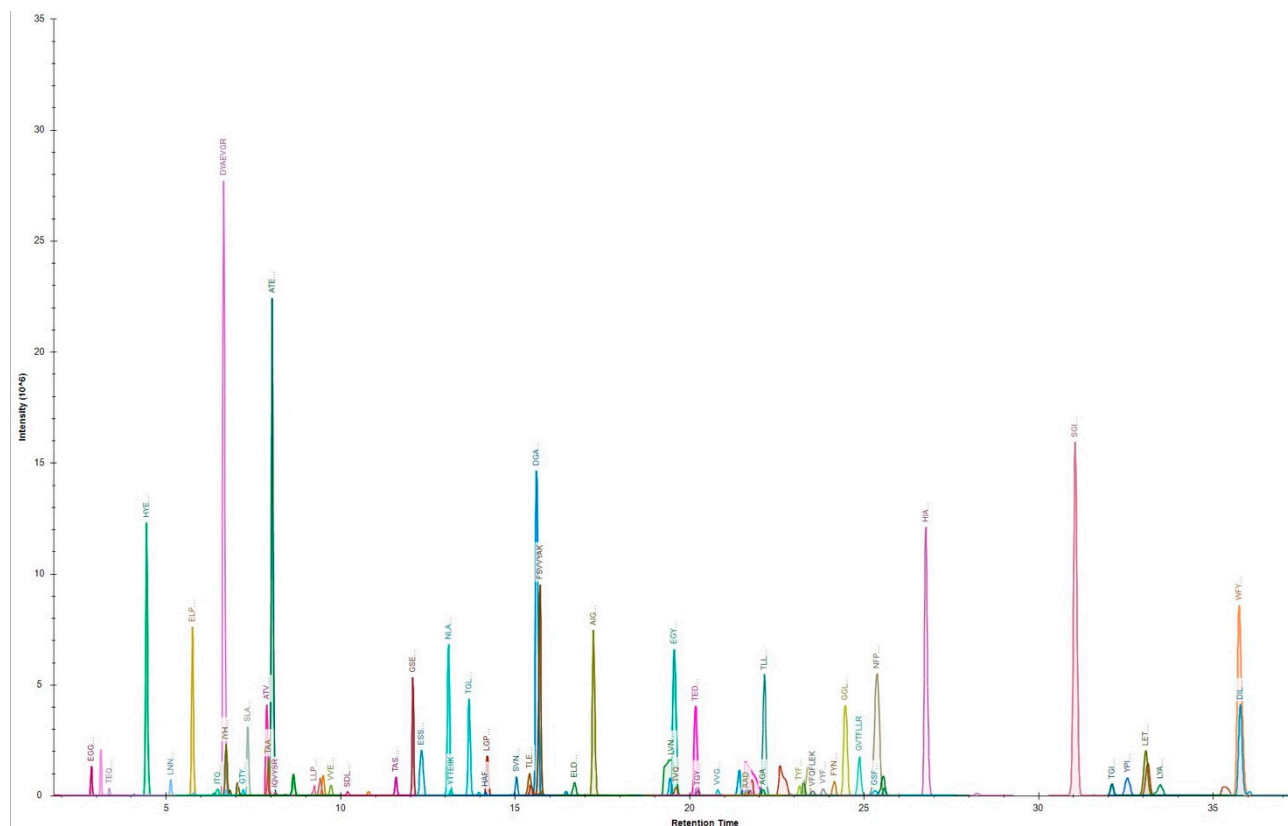

## Sup Methods

## Chemicals used

Serum (SST BD Vacutainer® ref 368815) and plasma (EDTA K2 BD Vacutainer® ref 367864) tubes.

DL-dithiothreitol (DTT), Iodoacetamide (IAA) from VWR (Radnor, USA)

AssayMAP Cartridge Reverse phase and C18 from Agilent technologies (Santa Clara, USA);

Acetonitrile ULC/MS, formic acid ULC/MS, Water ULC/MS from Biosolve (Dieuze, France);

Protein LoBind tubes 1.5 and 0.5 ml from Eppendorf (Hambourg, Germany).

Trizma® Hydrochloride (Tris-HCl) from Sigma Aldrich (Saint-Louis, USA);

Trypsin/LysC from Promega (Madison, USA)

Cryocheck™ Normal Reference Plasma, from Cryopep (Montpellier, France)

TFN-Specimen Collection card included in a DBS collection kit (Ref Art002) prepared by SpotToLab® (France).



## Preparation of samples before mass spectrometry analysis

The sample preparation protocols were automated using an Automatic puncher (PerkinElmer, CT USA) and an Agilent AssayMap Bravo Liquid Handling Platform (Agilent Technologies, Lexington, USA).

In all the sample, a 6-mm diameter punch was cut out of the cards using an automatized DBS Puncher instrument (1296-071, PerkinElmer, CT USA).

The punch was placed in a 96-deep-well plate (ABgene 1127, Portsmouth, USA). Protein content of the sample was extracted, reduced and alkylated, before a protein digestion with trypsin using a protocol patented (WO/2020/234287). All these steps were performed on BRAVO AssayMap automate (Agilent, Lexington, USA).

Briefly to DBS sample, proteins were eluted with 200  $\mu$ L ammonium bicarbonate (50mM), mixed at 1500rpm over 30min; denaturated by adding 200  $\mu$ L urea (8M) and shaken for 10 minutes (Sup Figure 1). Disulfide bridges were then reduced (21  $\mu$ L of DTT 0.2M, 12  $\mu$ L of Tris 1M pH 8.5) one hour at 37°C with stirring at 450rpm, and alkylated (18  $\mu$ L of IAA 1M, 6  $\mu$ L of Tris 1M pH 10) 30 minutes in the dark at 37°C with stirring at 450rpm. To stop the alkylation, 23  $\mu$ L DTT 0.2M was added. Sample was acidified with 10  $\mu$ L of formic acid and transfer into a new plate. Sample was cleaned on reverse phase tips (G5496-60086, Agilent T, Lexington, USA) following recommendation on the patent WO/2020/234287. Eluted samples were then dried on plate using a vacuum concentrator (Labconco, Kansas, USA). The tryptic digestion was carried out by resuspension of the sample with 2,8  $\mu$ g of Trypsin/LysC and 20  $\mu$ L of Tris 20 mM pH 8.5. The samples were incubated 14 hours at 37°C with shaking (450rpm). 3  $\mu$ L formic acid (pH<4) were added to stop the enzymatic reactions.

To the 2  $\mu$ L of plasma sample, sample preparation was also performed on BRAVO AssayMap automate (Agilent, Lexington, USA) with 96-well plate (PCR Eppendorf twin.tec® 96 LoBind, Eppendorf, Hambourg, Germany).

Normal Reference Plasma (Cryocheck™) was used as External quality control sample. This sample was analyzed in parallel in randomly select 8 positions in the 96-well plate. Inter-assay variability was calculated on these samples.

Briefly, plasma sample was denaturated with 100  $\mu$ L of Urea 4,8 M in Tris 50 mM pH 8,5 and mixing at 450rpm during 30 minutes. Then 6  $\mu$ L of DTT 0.2M were added to perform the reduction. Thereafter the samples were incubated one hour at 37°C while shaking (450rpm). To alkylate the samples, 12  $\mu$ L of IAA 400mM in Tris 1M pH 10 were added. The samples were incubated 30 minutes at 37°C while shaking (450rpm). The tryptic digestion was carried out by a sample with 420  $\mu$ L of DTT 2 mM, Tris 20 mM pH 8.5 followed by 18  $\mu$ L of Trypsin/LysC (0.31  $\mu$ g/ $\mu$ L). The samples were incubated 14 hours at 37°C while shaking (450rpm). 6  $\mu$ L formic acid (pH<4) were added to stop the enzymatic reactions. The tryptic peptides were desalted with C18 Tips conditioned with 50  $\mu$ L of 70% ACN/0.1% FA and equilibrated with 50  $\mu$ L of 0.1% FA. Loaded samples were washed twice with 50  $\mu$ L of 0.1% FA and eluted with 50  $\mu$ L of 70% ACN/0.1% FA. Elutions were dried by centrifugal evaporation on Speedvac (Labconco, Kansas, USA).

## Mass Spectrometry Analysis

Before injection, samples were resuspended in 20  $\mu$ L of 2% acetonitrile/0.1% formic acid/97.9% water and spiked with “Stable isotopically labelled peptide mix” described below. Samples were stirred for 10 min. Then they were centrifuged three minutes at 16000g. The liquid was transferred in polypropylene vials, ready for

analysis. All samples prepared were injected in duplicate. Between each measurement, a blank was measured to avoid carry-over.

LC separation of tryptic peptides was carried out on a UHPLC Nexera LC-40 liquid chromatography system (Shimadzu Corporation, Kyoto, Japan). Peptides were resolved using a reversed-phase column (Shim-pack GISSFTF-HP C18, 3  $\mu$ m, 150  $\times$  2.1 mm) at a flow rate of 400  $\mu$ L/min, and a temperature at 50°C.

A 48 min multistep gradient was performed using solvent B (99.9% acetonitrile and 0.1% formic acid), starting with 3% and increasing to 5% in 1.5 min, to 14% at 16 min, to 16% at 18 min, to 25% at 38 min. At 39 min, the column was flushed for 4 min with 80% of solvent B and then reconditioned with 3% of solvent B for 4 min.

Peptide analyses were carried out on a QqQ MS system (LCMS-8060, Shimadzu Corporation, Kyoto, Japan) in positive ion mode. The ESI source was set as follows: DL: 150°C, heat block: 250°C, interface: 400°C, nebulizer gas: 2 l/min, drying gas: 5 l/min, heating gas: 15 l/min. The Mass Spectrometer operated in scheduled MRM mode with a time windows of 3 minutes and a maximum loop time of 1.172s. Quadrupole resolution was unit to Q1 and Q3. CID gas pressure was fixed to 350 kPa. Collision energies (CE) were optimized for all the peptide transitions of interest (Sup Table 5). Finally, in our LC-MRM experiment 91 peptides were monitored corresponding to 66 proteins.

LabSolutions software (version 5.97) was used for data acquisition. Open-source Skyline® 20.2 software (<https://skyline.ms/project/home>) was used to analyse MRM data. The peak detection was performed automatically by the software and checked manually. Excel software was used to compute the ratio heavy/light.

### Stable isotopically labelled peptide mix

PeptiQuant™ Biomarker Assessment Kit (BAK-76) from CIL (Cambridge Isotope Laboratories, Tewksbury, Massachusetts) (reference: BAK-A6495-76) was used to normalize the MS signal of 101 peptides corresponding to 76 proteins (see below). 4  $\mu$ L of the SIS (Stable Isotope Standards) peptide mixture were spiked to each sample.

| Protein Name             | Peptide       | UniProt KB<br>Accession<br>No. | SIS added<br>in ng/mL |
|--------------------------|---------------|--------------------------------|-----------------------|
| Afamin                   | DADPDTFFAK    | P43652                         | 628,97                |
| Alpha-1-antichymotrypsin | NLAVSQVVHK    | P01011                         | 9265,86               |
| Alpha-1B-glycoprotein    | GVTFLLR       | P04217                         | 4170,61               |
| Alpha-1B-glycoprotein    | LETPDFQLFK    | P04217                         | 11734,02              |
| Alpha-2-antiplasmin      | LGNQEPGGQTALK | P08697                         | 3002,23               |
| Alpha-2-HS-glycoprotein  | FSVVYAK       | P02765                         | 13138,32              |
| Alpha-2-macroglobulin    | AIGYLNTGYQR   | P01023                         | 123951,41             |
| Antithrombin-III         | DDLTVSDAFHK   | P01008                         | 1144,96               |
| Apolipoprotein A-I       | ATEHLSTLSEK   | P02647                         | 123653,75             |
| Apolipoprotein A-IV      | LLPHANEVSQK   | P06727                         | 3684,45               |

|                                       |                      |        |           |
|---------------------------------------|----------------------|--------|-----------|
| Apolipoprotein B-100                  | TGISPLALIK           | P04114 | 35440,35  |
| Apolipoprotein C-II                   | TAAQNLYEK            | P02655 | 110,45    |
| Apolipoprotein D                      | VLNQELR              | P05090 | 4334,67   |
| Apolipoprotein E                      | AATVGSLAGQPLQER      | P02649 | 2606,90   |
| Apolipoprotein E                      | LGPLVEQGR            | P02649 | 3525,83   |
| Apolipoprotein M                      | AFLTTPR              | O95445 | 4517,27   |
| Apolipoprotein(a)                     | GTYSTTVTGR           | P08519 | 12879,13  |
| Beta-2-glycoprotein 1                 | ATVVYQGER            | P02749 | 5836,99   |
| Beta-2-microglobulin                  | IQVYSR               | P61769 | 58,09     |
| Beta-2-microglobulin                  | VNHVTLSPK            | P61769 | 166,59    |
| Beta-Ala-His dipeptidase              | SVVLIPLGAVDDGEHSQNEK | Q96KN2 | 162,47    |
| C4b-binding protein alpha chain       | EDVYVVGTVLR          | P04003 | 840,14    |
| C4b-binding protein alpha chain       | LNNGEITQHR           | P04003 | 1756,37   |
| Carbonic anhydrase 1                  | VLDALQAIK            | P00915 | 133,53    |
| Cartilage acidic protein 1            | GVASLFAGR            | Q9NQ79 | 126,57    |
| CD5 antigen-like                      | LVGGLHR              | O43866 | 4058,08   |
| cDNA FLJ53327                         | EGGQTAPASTR          | B7Z2X4 | 8025,93   |
| Ceruloplasmin                         | IYHSHIDAPK           | P00450 | 207231,05 |
| Cholinesterase                        | YLTLNTESTR           | P06276 | 323,71    |
| Clusterin                             | ELDESLQVAER          | P10909 | 13476,30  |
| Clusterin                             | TLLSNLEEAK           | P10909 | 2102,63   |
| Coagulation factor V                  | AEVDDVIQVR           | P12259 | 1668,69   |
| Coagulation factor X                  | TGIVSGFGR            | P00742 | 945,78    |
| Coagulation factor XI                 | TSEGLPSTR            | P03951 | 491,16    |
| Coagulation factor XII                | TEQAAVAR             | P00748 | 3328,40   |
| Coagulation factor XII                | VVGGLVALR            | P00748 | 1774,87   |
| Complement C1q subcomponent subunit A | PAFSAIR              | P02745 | 65,82     |
| Complement C1q subcomponent subunit B | IAFSATR              | P02746 | 1374,02   |
| Complement C1q subcomponent subunit C | FQSVFTVTR            | P02747 | 1609,25   |
| Complement C1r subcomponent           | GLTLHLK              | P00736 | 3024,37   |

|                                     |                     |        |          |
|-------------------------------------|---------------------|--------|----------|
| Complement C1r subcomponent         | YTTEIIK             | P00736 | 1197,82  |
| Complement C1s subcomponent         | TNFDNDIALVR         | P09871 | 2356,84  |
| Complement C2                       | HAFILQDTK           | P06681 | 791,73   |
| Complement C2                       | TAVDHIR             | P06681 | 1043,17  |
| Complement C3                       | SGIPIVTSPYQIHFTK    | P01024 | 95286,28 |
| Complement C3                       | TGLQEVEVK           | P01024 | 18837,72 |
| Complement C4-B                     | GSFEFPVGDAVSK       | P0C0L5 | 10706,43 |
| Complement C4-B                     | VGDTLNLNLR          | P0C0L5 | 13478,83 |
| Complement C5                       | VFQFLEK             | P01031 | 1561,24  |
| Complement component C8 alpha chain | HTSLGPLEAK          | P07357 | 2246,28  |
| Complement component C8 beta chain  | SDLEVAHYK           | P07358 | 1001,27  |
| Complement component C9             | LSPIYNLVPVK         | P02748 | 2939,00  |
| Complement component C9             | VVEESELAR           | P02748 | 2607,78  |
| Complement factor B                 | EELLPAQDIK          | P00751 | 1609,05  |
| Complement factor D                 | THHDGAITER          | P00746 | 612,65   |
| Complement factor I                 | HGNTDSEGIVEVK       | P05156 | 1890,56  |
| Corticosteroid-binding globulin     | ITQDAQLK            | P08185 | 4063,99  |
| C-reactive protein                  | AFVFPK              | P02741 | 85,43    |
| Cystatin-C                          | ALDFAVGEYNK         | P01034 | 98,77    |
| Fibrinogen alpha chain              | ESSSHHPGIAEFPSR     | P02671 | 52379,97 |
| Fibrinogen alpha chain              | GSESGIFTNTK         | P02671 | 85669,86 |
| Fibronectin                         | HTSVQTTSSGSGPFTDVR  | P02751 | 13157,67 |
| Fibronectin                         | SSPVVIDASTAIDAPSNLR | P02751 | 15084,41 |
| Fibulin-1                           | GYHLNEEGTR          | P23142 | 1619,46  |
| Fibulin-1                           | TGYFFDGISR          | P23142 | 1408,37  |
| Gelsolin                            | AGALNSNDAFVLK       | P06396 | 4068,25  |
| Gelsolin                            | TASDFITK            | P06396 | 4944,05  |
| Haptoglobin                         | DYAEVGR             | P00738 | 3277,19  |
| Haptoglobin                         | HYEGSTVPEK          | P00738 | 16686,91 |
| Hemoglobin subunit alpha            | TYFPHFDLSHGSAQVK    | P69905 | 1474,04  |
| Hemoglobin subunit alpha            | VGAHAGEYGAEALER     | P69905 | 1734,60  |

|                                                                        |                         |        |          |
|------------------------------------------------------------------------|-------------------------|--------|----------|
| Hemopexin                                                              | NFPSPVDAAFR             | P02790 | 23791,44 |
| Heparin cofactor 2                                                     | SVNDLYIQK               | P05546 | 1470,02  |
| Heparin cofactor 2                                                     | TLEAQLTPR               | P05546 | 8538,78  |
| Insulin-like growth factor-binding protein 3                           | FLNVLSPR                | P17936 | 195,86   |
| Insulin-like growth factor-binding protein complex acid labile subunit | LAELPADALGPLQR          | P35858 | 957,75   |
| Inter-alpha-trypsin inhibitor heavy chain H1                           | GSLVQASEANLQAAQDFVR     | P19827 | 3395,57  |
| Inter-alpha-trypsin inhibitor heavy chain H2                           | FYNQVSTPLLR             | P19823 | 14073,25 |
| Inter-alpha-trypsin inhibitor heavy chain H2                           | SLAPTAAAK               | P19823 | 7967,72  |
| Lipopolysaccharide-binding protein                                     | ITLPDFTGDLR             | P18428 | 93,81    |
| Lumican                                                                | FNALQYLR                | P51884 | 296,66   |
| Neuropilin-2                                                           | ALQVVR                  | O60462 | 1122,32  |
| Pigment epithelium-derived factor                                      | TVQAVLTVPK              | P36955 | 31071,46 |
| Protein AMBP                                                           | ETLLQDFR                | P02760 | 3091,12  |
| Protein AMBP                                                           | HHGPTITAK               | P02760 | 2508,66  |
| Prothrombin                                                            | ELLESYIDGR              | P00734 | 7205,79  |
| Prothrombin                                                            | TATSEYQTFFNPR           | P00734 | 10760,68 |
| Retinol-binding protein 4                                              | YWGVASFLQK              | P02753 | 590,56   |
| Serotransferrin                                                        | DGAGDVAFVK              | P02787 | 48334,64 |
| Serotransferrin                                                        | EGYYGYTGAFR             | P02787 | 52924,68 |
| Serum amyloid A-4 protein                                              | GNYDAAQR                | P35542 | 1351,12  |
| Sex hormone-binding globulin                                           | IALGGLLFPASNLR          | P04278 | 201,10   |
| Sex hormone-binding globulin                                           | TSSSFEVR                | P04278 | 1578,44  |
| Thyroxine-binding globulin                                             | AVLHIGEK                | P05543 | 1099,08  |
| Transthyretin                                                          | ALGISPFHEHAENVFTANDSGPR | P02766 | 24084,80 |
| Vasorin                                                                | ESHVTLASPEETR           | Q6EMK4 | 1166,84  |
| Vasorin                                                                | YLQGSSVQLR              | Q6EMK4 | 795,73   |
| Vitamin D-binding protein                                              | ELPEHTVK                | P02774 | 38192,37 |
| Vitamin D-binding protein                                              | THLPEVFLSK              | P02774 | 14228,53 |
| Vitamin K-dependent protein C                                          | LGEYDLR                 | P04070 | 416,68   |

Some additional targets were added on this panel. One more peptide was added to C-reactive protein (ESDTSYVSL[<sup>13</sup>C<sub>6</sub>]K), and one transthyretin peptide (AADDTWEPFASGK[<sup>13</sup>C<sub>6</sub>, <sup>15</sup>N<sub>2</sub>]), one albumin peptide (L[<sup>13</sup>C<sub>6</sub>]VNEVTEFAK), and two orosomucoid (ORM) or Alpha-1-acid glycoprotein 1 (AGA) peptides (TEDTIFL[<sup>13</sup>C<sub>6</sub>]R; WFYIASAFR[<sup>13</sup>C<sub>6</sub>, <sup>15</sup>N<sub>4</sub>]) were also added. SIS peptides were produced by PeptideSynthetics (Fareham, UK) with a purity up to 98%. Home made mix was spiked into the digested samples with 5 fmol of ESDTSYVSL[<sup>13</sup>C<sub>6</sub>]K; 10 fmol of AADDTWEPFASGK[<sup>13</sup>C<sub>6</sub>, <sup>15</sup>N<sub>2</sub>]; 50 fmol of L[<sup>13</sup>C<sub>6</sub>]VNEVTEFAK; 10 fmol of TEDTIFL[<sup>13</sup>C<sub>6</sub>]R; and 200 fmol of WFYIASAFR[<sup>13</sup>C<sub>6</sub>, <sup>15</sup>N<sub>4</sub>].

### Limit of quantification on MS assay

Performances were provided with the PeptiQuant™ Biomarker Assessment Kit (BAK-76) from CIL (Sup Table3)

To the added peptides, an increasing quantity of heavy peptides were added in digested normal plasma to determine the LOQ. LOQ was determined by the lowest points with a deviation from target of less than 20%. These analyses were performed in duplicates. L[<sup>13</sup>C<sub>6</sub>]VNEVTEFAK was spiked at 0, 4, 10, 20, 30 and 37.5 fmol in 2μL of digested plasma. AADDTWEPFASGK[<sup>13</sup>C<sub>6</sub>, <sup>15</sup>N<sub>2</sub>] was spiked at 0, 0.2, 0.4, 0.6, and 0.8 fmol in 2μL of digested plasma. ESDTSYVSL[<sup>13</sup>C<sub>6</sub>]K was spiked at 0, 0.01, 0.2, 0.6, and 2.4 fmol in 2μL of digested plasma. TEDTIFL[<sup>13</sup>C<sub>6</sub>]R was spiked at 0, 0.8, 1.6, 3.2, and 4.8 fmol in 2μL of digested plasma. WFYIASAFR[<sup>13</sup>C<sub>6</sub>, <sup>15</sup>N<sub>4</sub>] was spiked at 0, 16, 24, 32, 80 and 120 fmol in 2μL of digested plasma.

### Precision study

Intra-assay variability was calculated on replicate analysis of plasma and DBS samples.

Inter-assay variability was calculated on 8 QC of Normal reference plasma. A coefficient of variation was calculated on these 8 values.
